# Supplementary material for: Cobalt-bridged secondary building units in a titanium metal–organic framework catalyze cascade reduction of N-heteroarenes
Source: PubMed Central journal article supplement — Chem Sci. 2018 Dec 19;10(7):2193–8. doi: 10.1039/c8sc04610g (PMC6385530; doi:10.1039/c8sc04610g), 2018-12-19
Supplement: SC-010-C8SC04610G-s001.pdf [file SC-010-C8SC04610G-s001.pdf]

## Supporting Information

### **Cobalt-Bridged Secondary Building Units in a Titanium Metal-Organic Framework for Cascade Reduction of *N*-heteroarenes**

Xuanyu Feng,<sup>†,1</sup> Yang Song,<sup>†,1</sup> Justin S. Chen,<sup>1</sup> Zhe Li,<sup>1,2</sup> Emily Y. Chen,<sup>1</sup> Michael Kaufmann,<sup>1</sup>  
Cheng Wang,<sup>2</sup> and Wenbin Lin<sup>\*,1,2</sup>

<sup>1</sup>*Department of Chemistry, The University of Chicago, 929 E 57th St, Chicago, IL 60637, USA*

<sup>2</sup>*College of Chemistry and Chemical Engineering, iCHEM, State Key Laboratory of Physical Chemistry of Solid Surface, Xiamen University, Xiamen 361005, China*

*E-mail: wenbinlin@uchicago.edu*

| Contents                                                                                      | Page |
|-----------------------------------------------------------------------------------------------|------|
| 1. A List of Reported Ti-carboxylate MOFs                                                     | S2   |
| 2. Materials and Methods                                                                      | S3   |
| 3. Synthesis and Characterization of Ti <sub>3</sub> -BPDC                                    | S4   |
| 4. Synthesis and Characterization of Ti <sub>3</sub> -BPDC-CoCl and Ti <sub>3</sub> -BPDC-CoH | S15  |
| 5. Ti <sub>3</sub> -BPDC-CoH Catalyzed Cascade Reduction of Pyridines                         | S27  |
| 6. Ti <sub>3</sub> -BPDC-CoH Catalyzed Selective Reduction of Quinolines                      | S45  |
| 7. GC Retention Times                                                                         | S46  |
| 8. References                                                                                 | S48  |

## 1. A List of Reported Ti-carboxylate MOFs

**Table S1. A complete list of known Ti-carboxylate MOFs**

| Name                       | Molecular formula                                                                                   | Organic linker (L)                                                          | Inorganic unit<br>nuclearity | Network<br>dimensionality | Porosity                                                            | Reported<br>year   |
|----------------------------|-----------------------------------------------------------------------------------------------------|-----------------------------------------------------------------------------|------------------------------|---------------------------|---------------------------------------------------------------------|--------------------|
| MIL-125                    | Ti <sub>8</sub> O <sub>8</sub> (OH) <sub>4</sub> (L) <sub>6</sub>                                   | Terephthalate                                                               | 8                            | 3-D                       | S <sub>BET</sub> =1150 m <sup>2</sup> /g<br>(N <sub>2</sub> 77 K)   | 2009 <sup>1</sup>  |
| NTU-9                      | Ti <sub>2</sub> (H-L) <sub>2</sub> (H <sub>2</sub> -L) <sub>n</sub>                                 | 2,5-Dihydroxyterephthalate                                                  | 1                            | 2-D                       | ---                                                                 | 2014 <sup>2</sup>  |
| COK-69                     | Ti <sub>3</sub> O <sub>3</sub> (L) <sub>3</sub> ·DMF                                                | 1,4-Cyclohexane dicarboxylate                                               | 3                            | 3-D                       | S <sub>BET</sub> =29 m <sup>2</sup> /g<br>(N <sub>2</sub> 77 K)     | 2015 <sup>3</sup>  |
| MIL-101(Ti)                | Ti <sub>3</sub> O(OEt)(L) <sub>3</sub>                                                              | Terephthalate                                                               | 3                            | 3-D                       | S <sub>BET</sub> =2970 m <sup>2</sup> /g<br>(N <sub>2</sub> 77 K)   | 2015 <sup>4</sup>  |
| PCN-22                     | Ti <sub>7</sub> O <sub>6</sub> (L) <sub>12</sub> ·2(DEF)                                            | Tetrakis(4-carboxyphenyl) porphyrin                                         | 7                            | 3-D                       | S <sub>BET</sub> =1284 m <sup>2</sup> /g<br>(N <sub>2</sub> 77 K)   | 2015 <sup>5</sup>  |
| MIL-167                    | Ti(L) <sub>1.5</sub> (Et <sub>2</sub> MeNH) <sub>2</sub> ·n<br>H <sub>2</sub> O                     | 2,5-Dihydroxyterephthalate                                                  | 1                            | 3-D                       | ---                                                                 | 2016 <sup>6</sup>  |
| MIL-168                    | Ti(L)(cat)·2DEAH                                                                                    | 2,5-Dihydroxyterephthalate                                                  | 1                            | 1-D                       | ---                                                                 | 2016 <sup>6</sup>  |
| MIL-169                    | TiO <sub>0.5</sub> (L)(H <sub>2</sub> O)(H <sub>2</sub> -<br>pip) <sub>0.5</sub> ·nH <sub>2</sub> O | 2,5-Dihydroxyterephthalate                                                  | 1                            | 2-D                       | ---                                                                 | 2016 <sup>6</sup>  |
| MOF-901                    | Ti <sub>6</sub> O <sub>6</sub> (OMe) <sub>6</sub> (L) <sub>3</sub>                                  | 1,4-Phenylenebis(methanylylidene)<br>bis(azanylylidene)dibenzoate           | 6                            | 2-D                       | S <sub>BET</sub> =550 m <sup>2</sup> /g<br>(N <sub>2</sub> 77 K)    | 2016 <sup>7</sup>  |
| MOF-902                    | Ti <sub>6</sub> O <sub>6</sub> (OMe) <sub>6</sub> (L) <sub>3</sub>                                  | Biphenyl-4,4'-diylbis-<br>(methanylylidene)bis<br>(azanylylidene)dibenzoate | 6                            | 2-D                       | S <sub>BET</sub> =400 m <sup>2</sup> /g<br>(N <sub>2</sub> 77 K)    | 2017 <sup>8</sup>  |
| MIL-177-LT                 | Ti <sub>12</sub> O <sub>15</sub> (mdip) <sub>3</sub><br>(formate) <sub>6</sub>                      | 3,3',5,5'-tetra-<br>carboxydiphenylmethane                                  | 12                           | 3-D                       | S <sub>BET</sub> =730 m <sup>2</sup> /g<br>(N <sub>2</sub> 77 K)    | 2018 <sup>9</sup>  |
| DGIST-1                    | Ti <sub>2</sub> (μ <sub>2</sub> -O) <sub>2</sub> (L)                                                | Tetrakis(4-carboxyphenyl) porphyrin                                         | 2D-chain                     | 3-D                       | S <sub>BET</sub> =1957.3 m <sup>2</sup> /g<br>(N <sub>2</sub> 77 K) | 2018 <sup>10</sup> |
| <b>Ti<sub>3</sub>-BPDC</b> | <b>Ti<sub>3</sub>(BPDC)<sub>3</sub>(OH)<sub>2</sub><br/>(OAc)<sub>4</sub></b>                       | <b>Biphenyl-4,4'-dicarboxylate</b>                                          | <b>3</b>                     | <b>3-D</b>                | <b>S<sub>BET</sub>=636 m<sup>2</sup>/g<br/>(N<sub>2</sub> 77 K)</b> | <b>This work</b>   |

Note: Heterometallic Ti-MOFs reported in recent years are not included here.

## 2. Materials and Methods

All of the reactions and manipulations were carried out under N<sub>2</sub> with the use of a glovebox or Schlenk technique, unless otherwise indicated. Tetrahydrofuran and toluene were purified by passing through a neutral alumina column under N<sub>2</sub>. Benzene, *d*<sub>6</sub>-benzene, and *n*-octane were distilled over CaH<sub>2</sub>. Pyridine and quinoline derivatives were purchased from Fisher or Aldrich, distilled, and then dried over 4Å molecular sieves prior to use. Pinacolborane was purchased from Sigma-Aldrich and distilled before use. Powder X-ray diffraction (PXRD) data was collected on Bruker D8 Venture diffractometer using Cu Kα radiation source ( $\lambda = 1.54178 \text{ \AA}$ ). N<sub>2</sub> sorption experiments were performed on a Micrometrics TriStar II 3020 instrument. Thermogravimetric analysis (TGA) was performed in air using a Shimadzu TGA-50 equipped with a platinum pan and heated at a rate of 1.5 °C per min. Fourier-transform infrared (FT-IR) spectra were collected using a Nexus 870 spectrometer (Thermo Nicolet) installed with Diffuse Reflectance Infrared Fourier Transform Spectroscopy (DRIFTS) system. X-ray Fluorescence (XRF) data was collected using a Rigaku NEX DE Energy Dispersive X-ray Fluorescence Spectrometer. X-ray photoelectron spectroscopy (XPS) data was collected using an AXIS Nova spectrometer (Kratos Analytical) with monochromatic Al Kα X-ray source; Al anode was powered at 10 mA and 15 kV, and the instrument work function was calibrated to give an Au 4f<sub>7/2</sub> metallic gold binding energy (BE) of 83.95 eV. Instrument base pressure was ca.  $1 \times 10^{-9}$  Torr. The analysis area size was  $0.3 \times 0.7 \text{ mm}^2$ . For calibration purposes, the binding energies were referenced to the C 1s peak at 284.8 eV. Survey spectra were collected with a step size of 1 eV and 160 eV pass energy. ICP-MS data was obtained with an Agilent 7700x ICP-MS and analyzed using ICP-MS MassHunter version B01.03. Samples were diluted in a 2% HNO<sub>3</sub> matrix and analyzed with a <sup>159</sup>Tb internal standard against a 12-point standard curve over the range from 0.1 ppb to 500 ppb. The correlation was >0.9997 for all analyses of interest. Data collection was performed in Spectrum Mode with five replicates per sample and 100 sweeps per replicate.



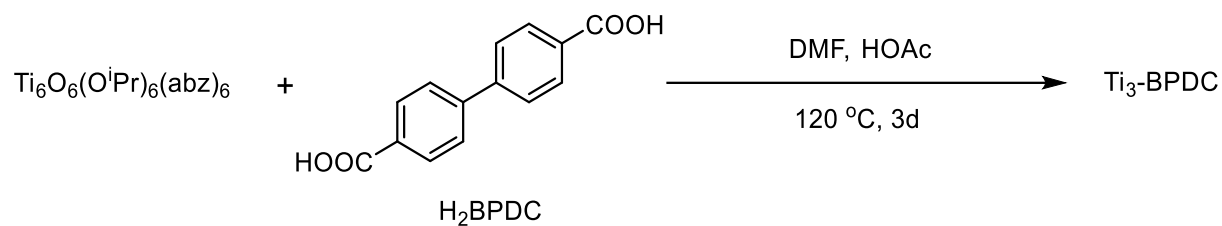

### 3.3 Single Crystal X-ray Crystallography of Ti<sub>3</sub>-BPDC

The structure of Ti<sub>3</sub>-BPDC was determined by single crystal X-ray diffraction. The single crystal intensity data was collected at 298K on a Bruker D8 VENTURE with PHOTON 100 CMOS detector system equipped with a Mo-targeted micro-focus X-ray tube ( $\lambda = 0.71073 \text{ \AA}$ ). Data reduction and integration were performed with the Bruker APEX3 software package (Bruker AXS, version 2015.5-2, 2015). Data were scaled and corrected for absorption effects using the multi-scan procedure as implemented in SADABS (Bruker AXS, version 2014/5, 2015, part of Bruker APEX3 software package). The structure was solved by SHELXT (Version 2014/5) and refined by a full-matrix least-squares procedure using OLEX2 software package (XL refinement program version 2014/7). Crystallographic data and details of the data collection and structure refinement are listed in Table S2.

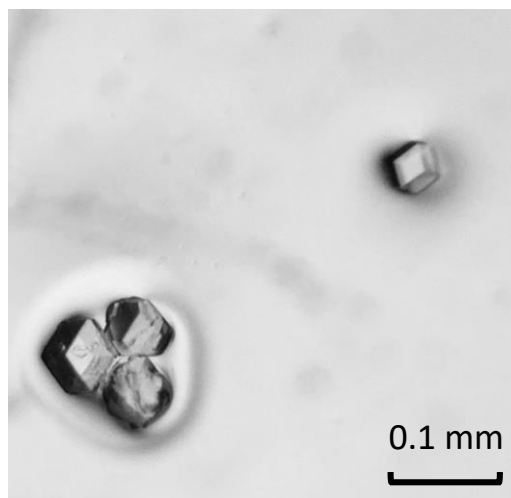

**Figure S1.** Optical microscope photo of Ti<sub>3</sub>-BPDC single crystals used for X-ray structure determination.

**Table S2.** Crystallographic Information of Ti<sub>3</sub>-BPDC.

| Name                                                    | Ti <sub>3</sub> -BPDC                                                      |
|---------------------------------------------------------|----------------------------------------------------------------------------|
| CCDC                                                    | 1859034                                                                    |
| <b>Formula</b>                                          | C <sub>42</sub> H <sub>26</sub> O <sub>14</sub> Ti <sub>3</sub>            |
| <b>Formula weight</b>                                   | 898.26                                                                     |
| <b>Crystal system</b>                                   | Trigonal                                                                   |
| <b>Space group</b>                                      | R $\bar{3}m$                                                               |
| <b>a, Å</b>                                             | 25.8366(16)                                                                |
| <b>b, Å</b>                                             | 25.8366(16)                                                                |
| <b>c, Å</b>                                             | 13.6675(9)                                                                 |
| <b><math>\alpha</math>, deg</b>                         | 90                                                                         |
| <b><math>\beta</math>, deg</b>                          | 90                                                                         |
| <b><math>\gamma</math>, deg</b>                         | 120                                                                        |
| <b>V, Å<sup>3</sup></b>                                 | 7901.1(11)                                                                 |
| <b>Z</b>                                                | 3                                                                          |
| <b>Temperature, K</b>                                   | 296.96                                                                     |
| <b>F(000)</b>                                           | 1380.0                                                                     |
| <b>Density (calcd. g/cm<sup>3</sup>)</b>                | 0.569                                                                      |
| <b>Wavelegth, Å</b>                                     | 0.71073                                                                    |
| <b>Absorption coeff. (mm<sup>-1</sup>)</b>              | 0.248                                                                      |
| <b>2<math>\Theta</math> range data collection</b>       | 4.706 to 49.454                                                            |
| <b>Index ranges</b>                                     | -30 $\leq$ h $\leq$ 30<br>-30 $\leq$ k $\leq$ 27<br>-16 $\leq$ l $\leq$ 15 |
| <b>Reflections collected</b>                            | 16826                                                                      |
| <b>Indepedend reflections</b>                           | 1614                                                                       |
| <b>R(int)</b>                                           | 0.0293                                                                     |
| <b>Data/restraints/parameters</b>                       | 1614/7/64                                                                  |
| <b>Goodness-of-fit on F<sup>2</sup></b>                 | 1.607                                                                      |
| <b>Final R indices [I &gt; 2<math>\sigma</math>(I)]</b> |                                                                            |

---

**R indices (all data)**

$R_1 = 0.1129$ ,  $wR_2 = 0.3430$

$R_1 = 0.1213$ ,  $wR_2 = 0.3547$

---

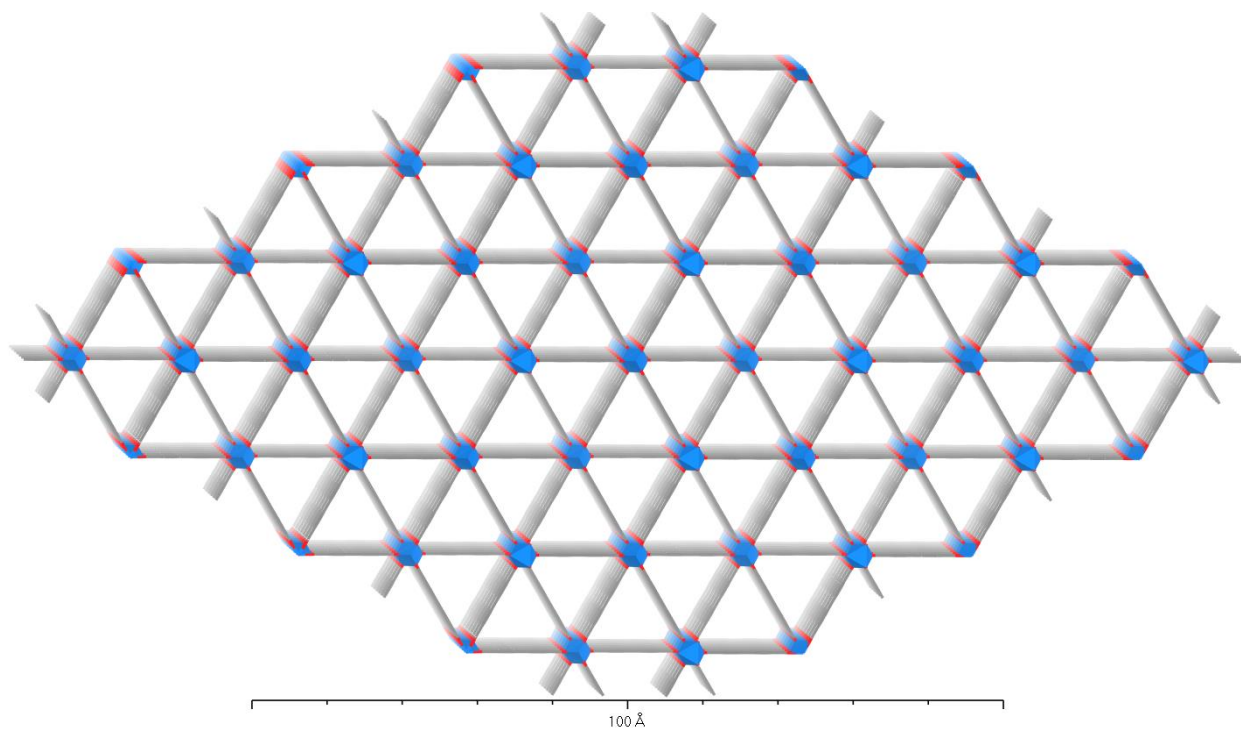

**Figure S2.** Crystal structure of Ti<sub>3</sub>-BPDC as viewed along the *c* axis (H atoms omitted for clarity).

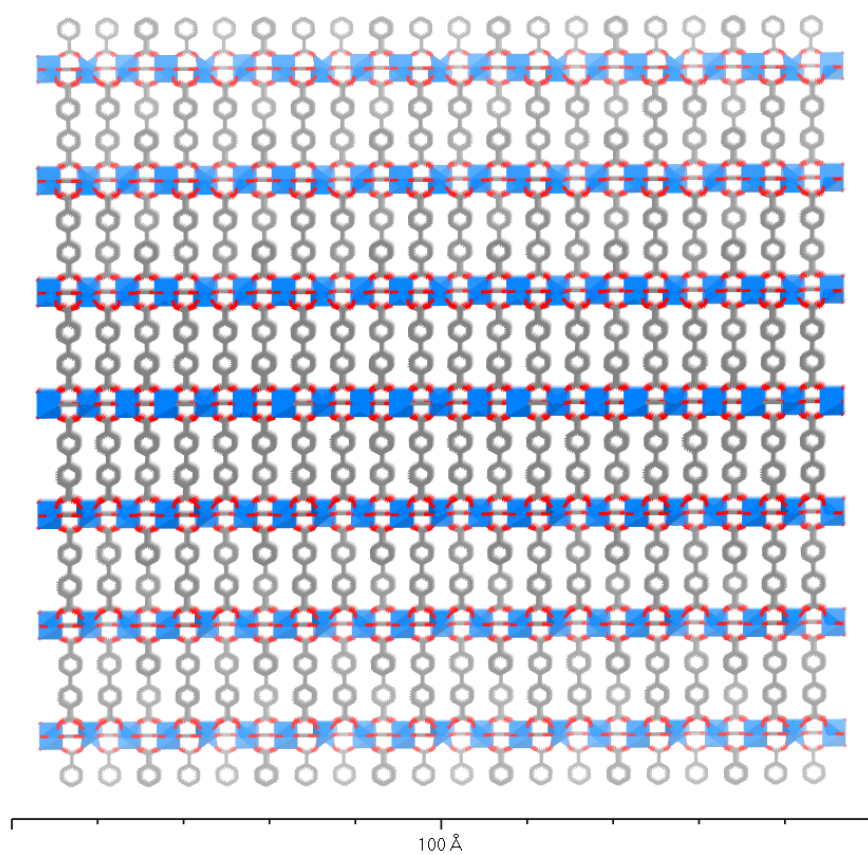

**Figure S3.** Crystal structure of Ti<sub>3</sub>-BPDC as viewed along the *a* axis (H atoms omitted for clarity).



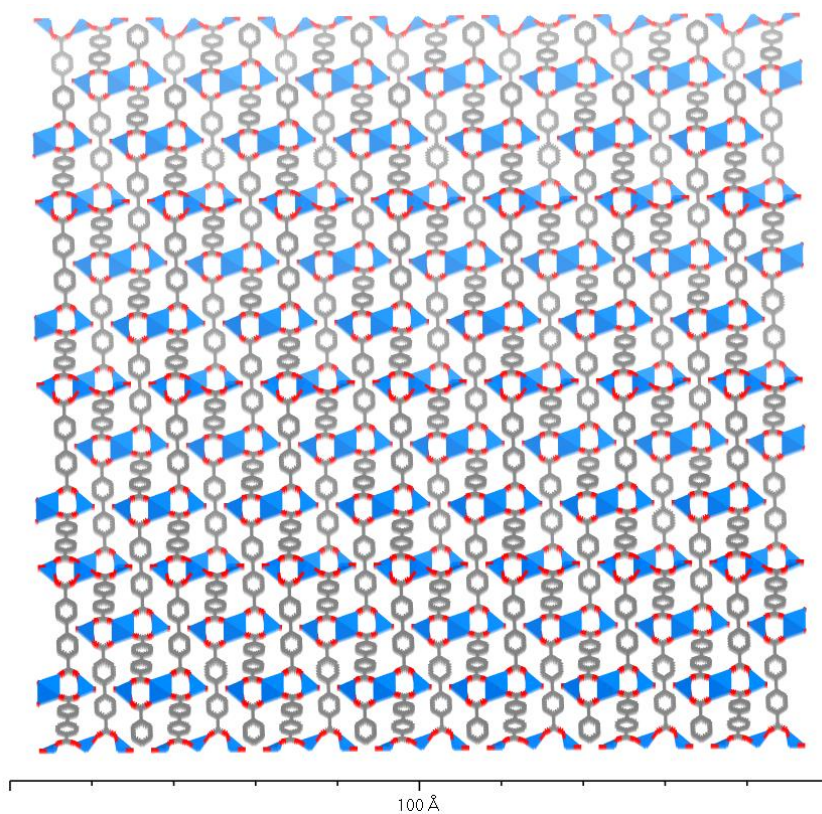

**Figure S4.** Crystal structure of Ti<sub>3</sub>-BPDC as viewed along the *b* axis (H atoms omitted for clarity)

### 3.4 Topological Analysis of Ti<sub>3</sub>-BPDC

The topological analysis of Ti<sub>3</sub>-BPDC was performed using TOPOS 4.0 professional. The Ti<sub>3</sub> cluster is connected by six carboxylate groups. The overall structure is simplified into a unimodal 4-connected net with a point symbol of {6<sup>6</sup>}, with the extended point symbol [6(2).6(2).6(2).6(2).6(2).6(2)].

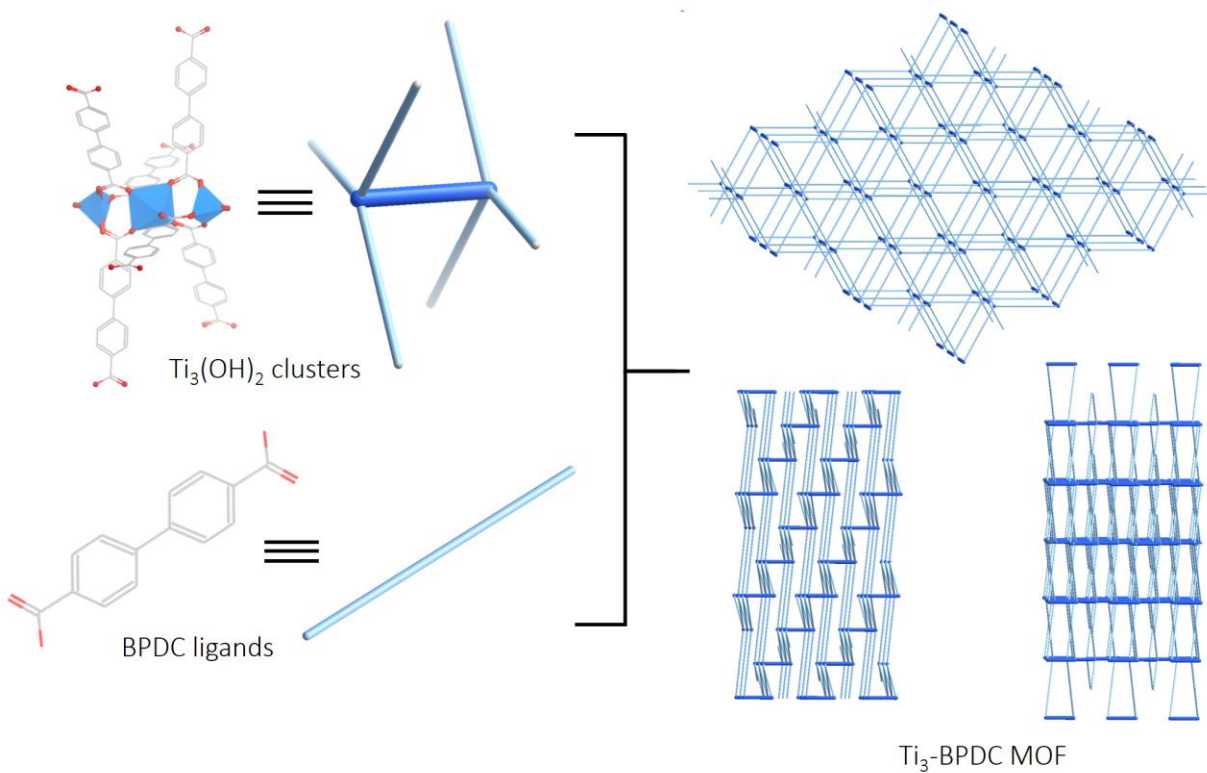

**Figure S5.** Schematic representation of the 3D network of  $\text{Ti}_3\text{-BPDC}$ .  $\text{Ti}_3\text{-BPDC}$  has *dia* topology.

### 3.5 $^1\text{H}$ NMR spectra of digested $\text{Ti}_3\text{-BPDC}$

A dried sample of  $\text{Ti}_3\text{-BPDC}$  (1.0 mg) was digested by 100  $\mu\text{L}$   $\text{D}_3\text{PO}_4$  (D, 99%), 50  $\mu\text{L}$  HF (48%), and 50  $\mu\text{L}$   $\text{D}_2\text{O}$ . The sample was then sonicated for 3 h to completely dissolve  $\text{Ti}_3\text{-BPDC}$ , followed by adding 500  $\mu\text{L}$   $\text{DMSO-}d_6$  for  $^1\text{H}$  NMR analysis.

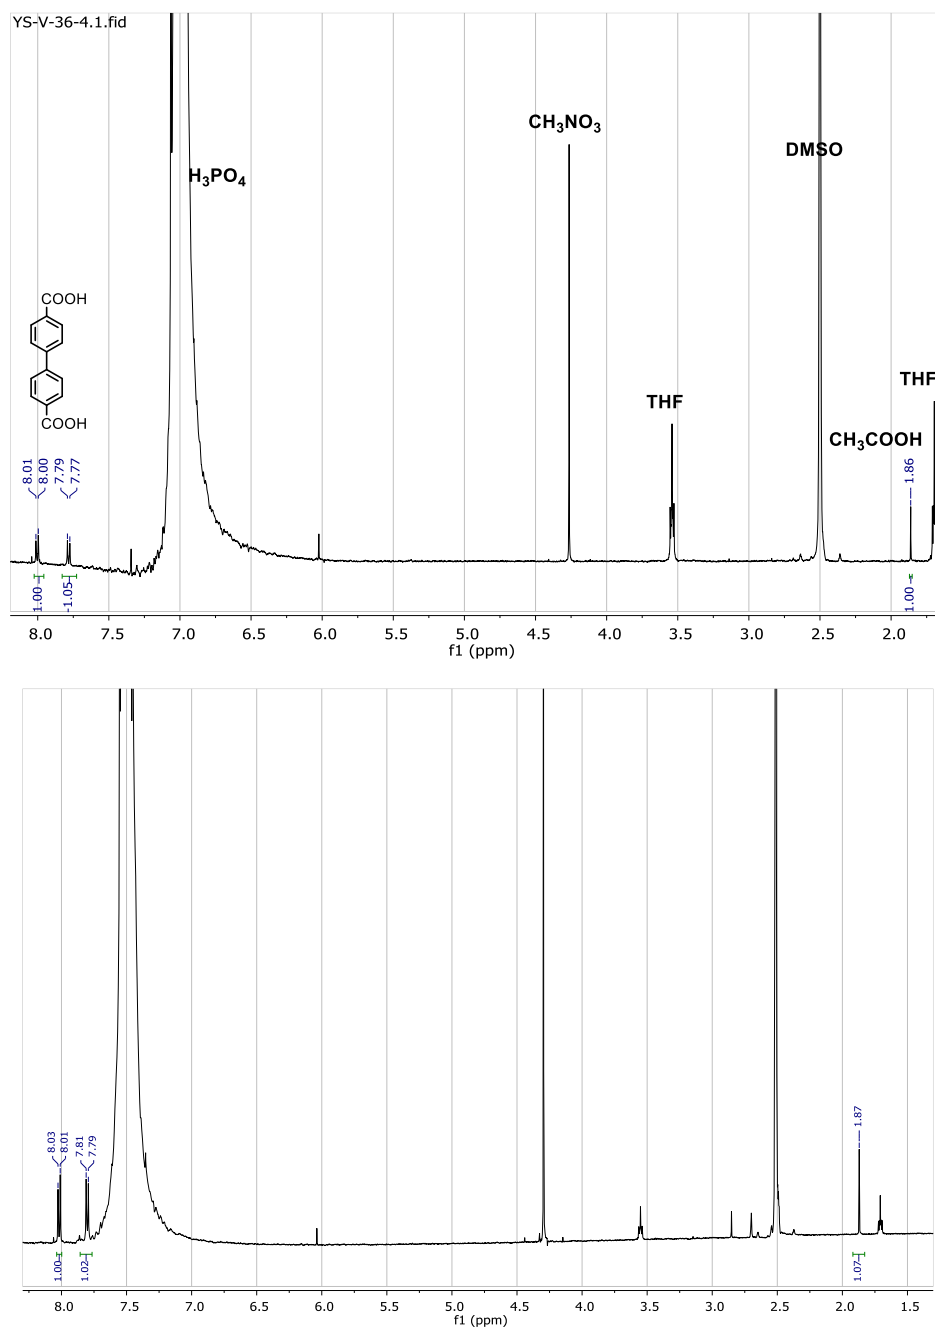

**Figure S6.** <sup>1</sup>H NMR spectra of digested Ti<sub>3</sub>-BPDC. Based on the NMR data, we propose acetate as the counter anion in Ti<sub>3</sub>-BPDC. Two parallel MOF digestion experiments were conducted. The <sup>1</sup>H NMR (500 MHz, DMSO-*d*<sub>6</sub>) integral gave an average of 1.38 equiv. of acetates per BPDC ligand, corresponding well to the chemical formula Ti<sub>3</sub>(BPDC)<sub>3</sub>(OH)<sub>2</sub>(CH<sub>3</sub>COO)<sub>4</sub>. CH<sub>3</sub>NO<sub>2</sub> was added as an internal standard whereas THF was in the MOF channels.

### 3.6 Thermogravimetric Analysis

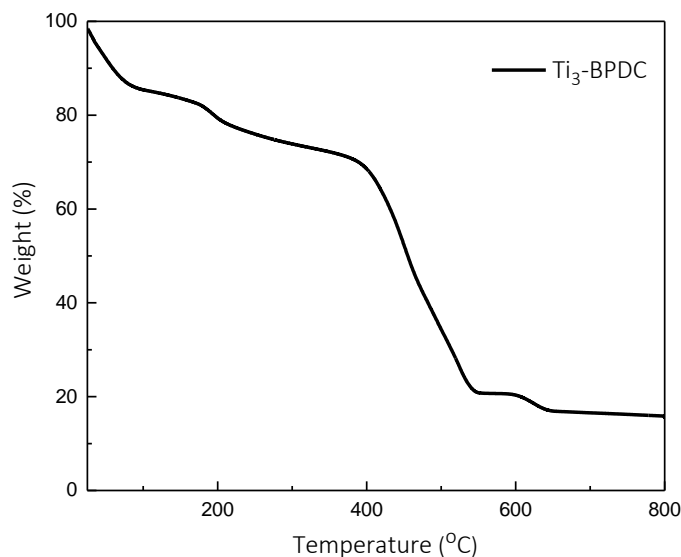

**Figure S7.** TGA curve of Ti<sub>3</sub>-BPDC. The first weight loss (25.2%) in the 25-274 °C temperature range corresponds to the removal of adsorbed solvents in the pores. The second weight loss (78.5%) in the 274-800 °C temperature range corresponds to the decomposition of the MOF to TiO<sub>2</sub>, consistent with the calculated weight loss of 78.9% based on the conversion from Ti<sub>3</sub>(BPDC)<sub>3</sub>(OH)<sub>2</sub>(CH<sub>3</sub>COO)<sub>4</sub> to (TiO<sub>2</sub>)<sub>3</sub>.

### 3.7 Nitrogen Sorption Isotherms of Ti<sub>3</sub>-BPDC

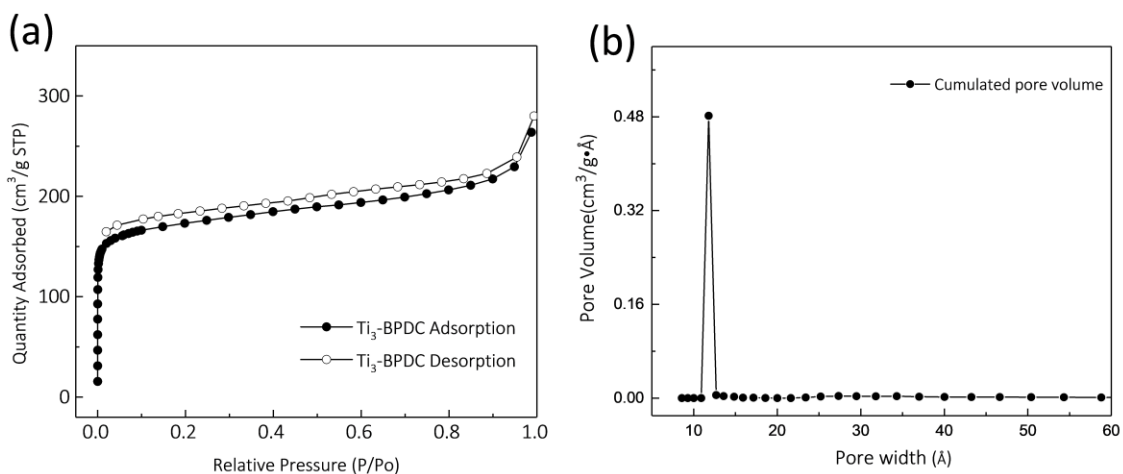

**Figure S8. (a)** Nitrogen sorption isotherms of Ti<sub>3</sub>-BPDC (77K). Ti<sub>3</sub>-BPDC has an BET surface areas of 636 m<sup>2</sup>/g. **(b)** Pore size distributions of Ti<sub>3</sub>-BPDC.

Theoretical surface area of Ti<sub>3</sub>-BPDC was calculated to be 929 m<sup>2</sup>/g using the Materials Studio software, which is slightly higher than the experimental surface area of 636 m<sup>2</sup>/g. This discrepancy is possibly due to the presence of defects in the MOF structure and incomplete activation of the MOF before N<sub>2</sub> sorption studies.

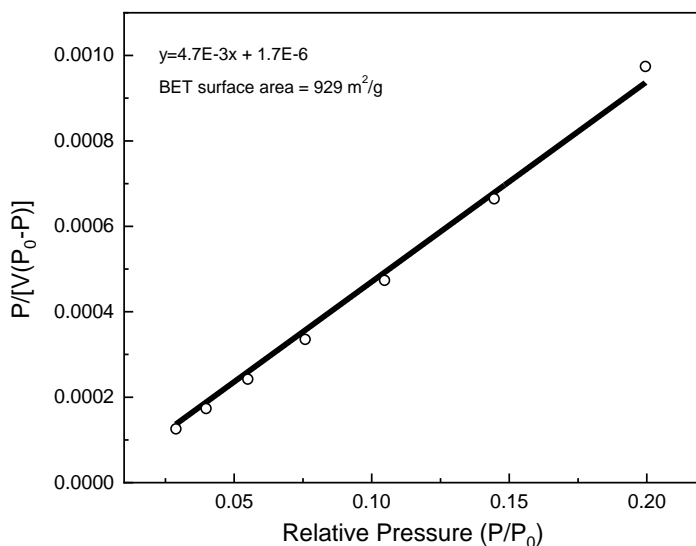

**Figure S9.** The BET Plot of the calculated N<sub>2</sub> isotherm of Ti<sub>3</sub>-BPDC.

### 3.8 Isotope Labeling Experiment of Ti-OH in Ti<sub>3</sub>-BPDC

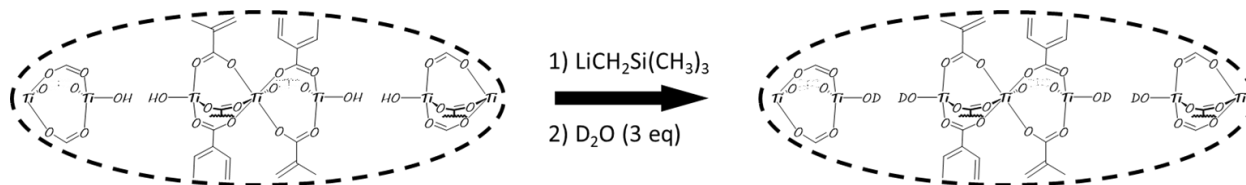

To further confirm the existence of Ti-OH groups in Ti<sub>3</sub>-BPDC MOF, DRIFTS analysis was conducted on the isotopically labelled sample of Ti<sub>3</sub>-BPDC. Specifically, Ti<sub>3</sub>-BPDC was first fully deprotonated by 5 eq of LiCH<sub>2</sub>Si(CH<sub>3</sub>)<sub>3</sub> (*w.r.t.* Ti-OH) in hexanes. After removal of excess base, the deprotonated MOF was treated with 3 eq of D<sub>2</sub>O to generate Ti<sub>3</sub>-BPDC-OD. Ti<sub>3</sub>-BPDC-

OD was evacuated at 50 °C for 24 h before DRIFTS analysis. Two main differences were observed between the IR spectra of Ti<sub>3</sub>-BPDC-OH and Ti<sub>3</sub>-BPDC-OD. First, the  $\nu(\text{Ti-OH}) = 3678 \text{ cm}^{-1}$  disappeared after H/D exchange, indicating the loss of Ti-OH groups. Second, two new stretching bands appeared at 2662  $\text{cm}^{-1}$  and 2617  $\text{cm}^{-1}$  in the DRIFTS spectra of Ti<sub>3</sub>-BPDC-OD, which can be attributed to  $\nu(\text{Ti-OD})$  and  $\nu(\text{D}_2\text{O})$ , respectively.<sup>14, 15</sup> The observed  $\nu(\text{Ti-OD})$  at 2662  $\text{cm}^{-1}$  is in good agreement with the calculated  $\nu(\text{Ti-OD})$  of 2676  $\text{cm}^{-1}$  based on reduced mass.

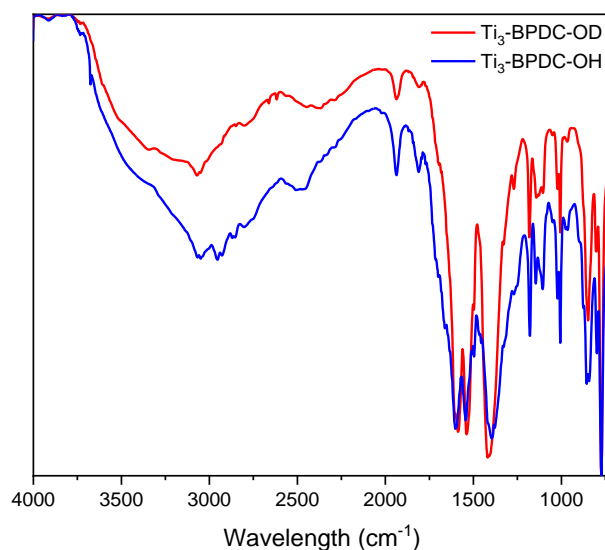

**Figure S10.** DRIFT spectra of Ti<sub>3</sub>-BPDC-OH (=Ti<sub>3</sub>-BPDC) and Ti<sub>3</sub>-BPDC-OD (after H/D exchange).

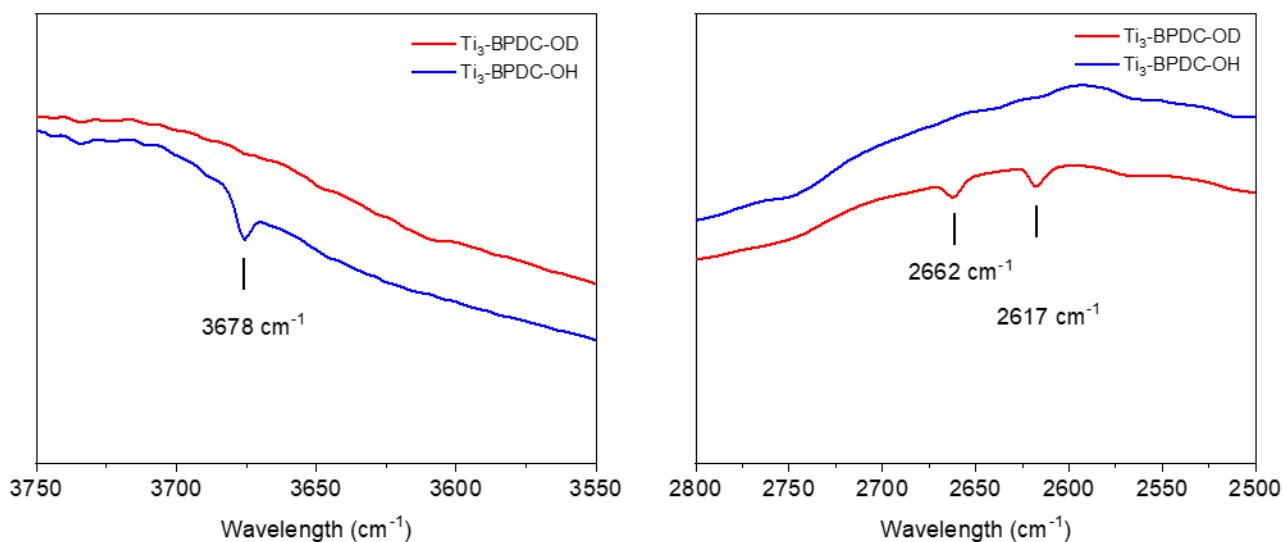

**Figure S11.** a) The disappearance of  $\nu(\text{Ti-OH}) = 3678 \text{ cm}^{-1}$  indicated the loss of Ti-OH groups. b) After H/D exchange,  $\nu(\text{Ti-OD}) = 2662 \text{ cm}^{-1}$  and  $\nu(\text{D}_2\text{O}) = 2617 \text{ cm}^{-1}$  were detected.

## 4. Synthesis and Characterization of $\text{Ti}_3\text{-BPDC-CoCl}$ and $\text{Ti}_3\text{-BPDC-CoH}$

### 4.1 Synthesis of $\text{Ti}_3\text{-BPDC-CoCl}$

In a  $\text{N}_2$ -filled glovebox,  $\text{Ti}_3\text{-BPDC}$  (200 mg) in 15 mL THF was cooled to  $-30 \text{ }^\circ\text{C}$  for 30 min. To the cold suspension,  $\text{LiCH}_2\text{SiMe}_3$  (1.0 M in pentane, 2 ml, 5 equiv. to  $\mu\text{-OH}$ ) was added dropwise and the resultant light yellow mixture was stirred at  $-30 \text{ }^\circ\text{C}$  for 3 h. The light yellow solid was collected after centrifugation, and washed with THF 5-6 times over 6 h. Then, the lithiated  $\text{Ti}_3\text{-BPDC}$  was transferred to a vial containing 20 mL THF solution of  $\text{CoCl}_2$  (52 mg, 1 equiv. to  $\mu\text{-OLi}$ ). The mixture was stirred overnight and the deep blue solid was then centrifuged and washed with THF 5-8 times. The metalated MOF was stored in THF in the glovebox for further use. ICP-MS analysis indicated a Ti/Co ratio of 3.1. PXRD showed the crystallinity of MOF was maintained after metalation.

### 4.2 Single Crystal X-ray Crystallography of $\text{Ti}_3\text{-BPDC-CoCl}$

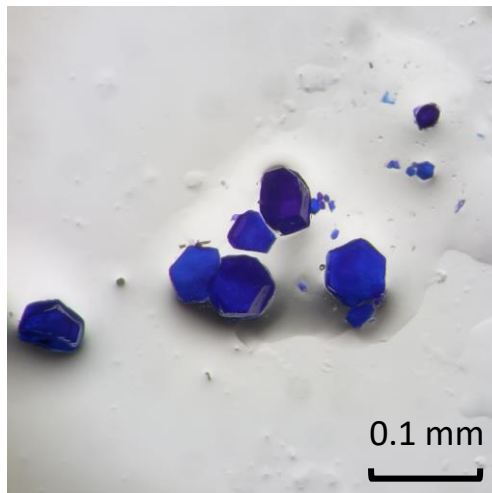

**Figure S12.** Optical microscope photo of typical Ti<sub>3</sub>-BPDC-CoCl single crystals used for X-ray structure determination.

We made several attempts to obtain the single crystal structure of the metalated MOF. The Ti<sub>3</sub>-BPDC-CoCl showed similar unit cell parameters and volume to the pristine MOF. However, due to the low resolution and highly disorder of Co centers, we failed to determine the single crystal structure after these trials.

**Table S3.** Crystallographic Information of Ti<sub>3</sub>-BPDC-CoCl.

| Name              | Ti <sub>3</sub> -BPDC-CoCl |
|-------------------|----------------------------|
| a, Å              | 25.79                      |
| b, Å              | 25.79                      |
| c, Å              | 13.67                      |
| $\alpha$ , deg    | 90.00                      |
| $\beta$ , deg     | 90.00                      |
| $\gamma$ , deg    | 120.00                     |
| V, Å <sup>3</sup> | 7877                       |
| Temperature, K    | 296.96                     |
| Wavelegth, Å      | 0.71073                    |

#### 4.2 Thermogravimetric Analysis of Ti<sub>3</sub>-BPDC-CoCl



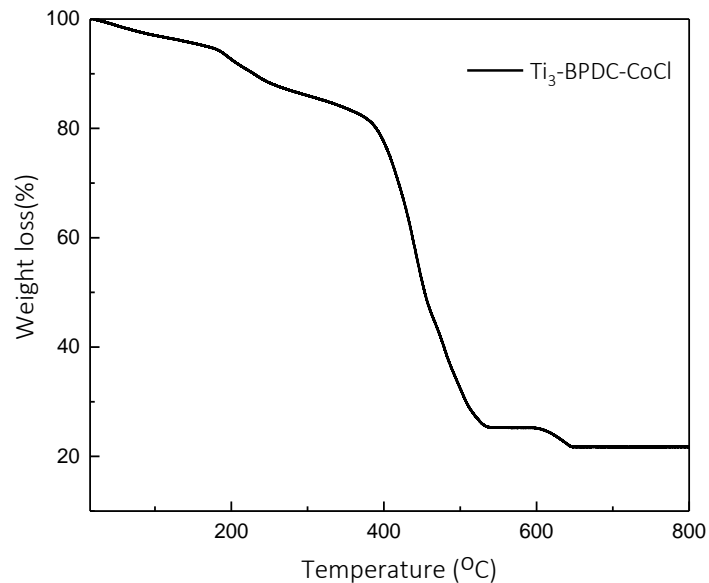

**Figure S13.** TGA curve of  $\text{Ti}_3\text{-BPDC-CoCl}$ . The first weight loss (14.5%) in the 25-312 °C temperature range corresponds to the removal of adsorbed solvents in the pores. The second weight loss (74.6%) in the 312-800 °C temperature range corresponds to the decomposition of the MOF to  $\text{TiO}_2$ , consistent with a calculated weight loss of 74.0% based on the conversion of  $\text{Ti}_3(\text{BPDC})_3(\text{O})_2\text{CoCl}(\text{THF})\text{Li}(\text{CH}_3\text{COO})_4$  to  $(\text{TiO}_2)_3(\text{Co}_2\text{O}_3)_{0.5}(\text{Li}_2\text{O})_{0.5}$ .

#### 4.3 Nitrogen Sorption Isotherms of $\text{Ti}_3\text{-BPDC-CoCl}$

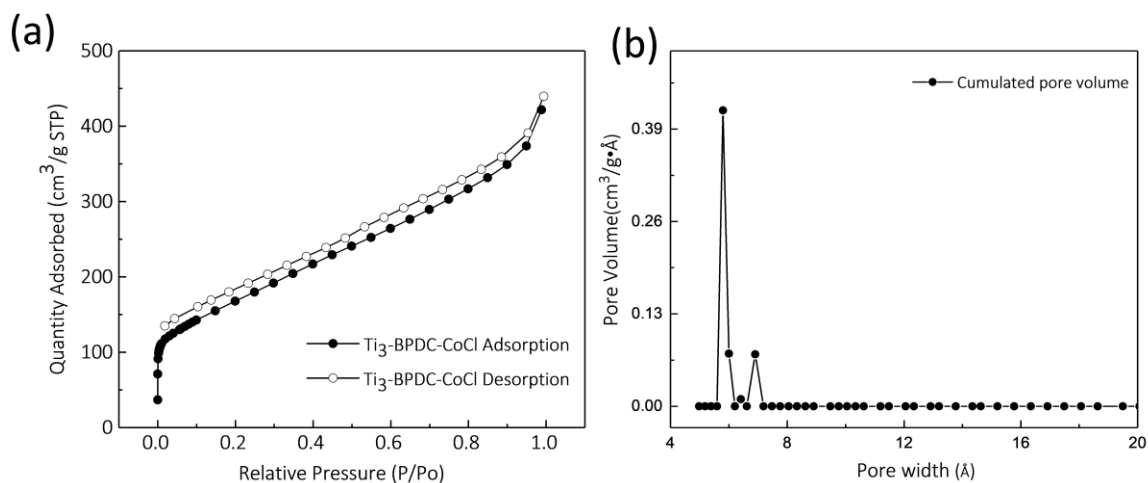

**Figure S14. (a)** Nitrogen sorption isotherms of  $\text{Ti}_3\text{-BPDC-CoCl}$  (77K).  $\text{Ti}_3\text{-BPDC-CoCl}$  has a BET surface areas of  $480 \text{ m}^2/\text{g}$ . **(b)** Pore size distributions of  $\text{Ti}_3\text{-BPDC-CoCl}$ .

#### 4.4 MOF Structural Stability before and after Postsynthetic Metalation

To address the chemical stability of  $\text{Ti}_3\text{-BPDC}$  systems, a series of PXRD analyses were conducted on  $\text{Ti}_3\text{-BPDC}$  and  $\text{Ti}_3\text{-BPDC-CoCl}$  under different conditions (Figure S15). First, the PXRD patterns of the above two materials were checked after soaking in different solvents.  $\text{Ti}_3\text{-BPDC}$  and  $\text{Ti}_3\text{-BPDC-CoCl}$  were stable in both polar solvents, *e.g.*, DMF, THF, and non-polar solvent, *e.g.*, toluene. Then, MOF stability was examined by treatment with acid, base, and water in DMF.  $\text{Ti}_3\text{-BPDC}$  and  $\text{Ti}_3\text{-BPDC-CoCl}$  were stable in TEA/DMF (5:95, v/v). However, both  $\text{Ti}_3\text{-BPDC}$  and  $\text{Ti}_3\text{-BPDC-CoCl}$  lost their crystallinity when treated with water ( $\text{H}_2\text{O}/\text{DMF}$ , 5/95, v/v) or acid ( $\text{HCl}/\text{DMF}$ , 5/95, v/v). Furthermore, all of the above treatments and PXRD analyses were conducted in air, demonstrating MOF stability to oxygen and moisture in air.

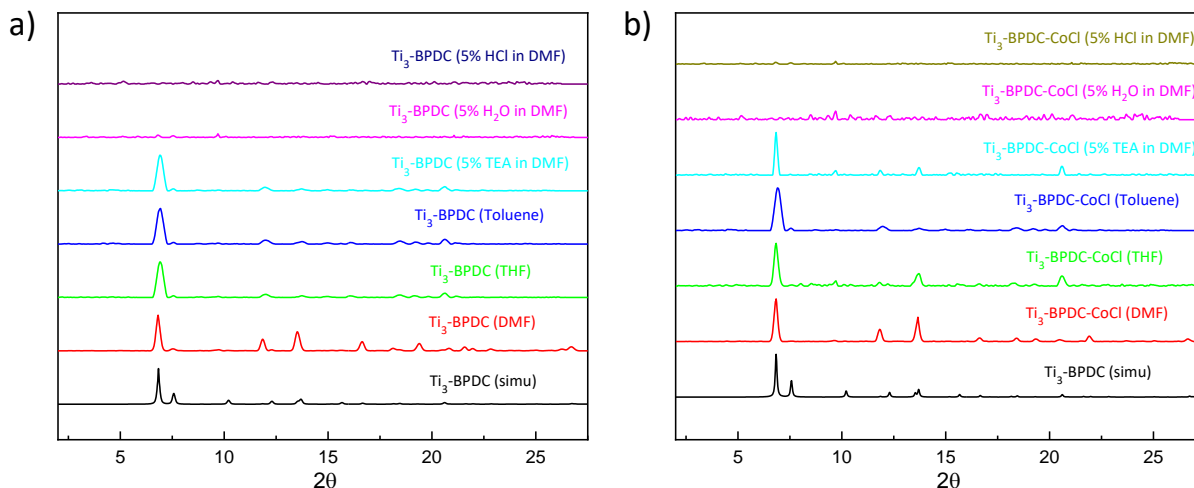

**Figure S15.** PXRD patterns of a)  $\text{Ti}_3\text{-BPDC}$  and b)  $\text{Ti}_3\text{-BPDC-CoCl}$  in different solvents and after treatment with acid, base, and  $\text{H}_2\text{O}$ .

#### 4.5 Computational study on $\text{Ti}_3\text{-BPDC-CoCl}$

Density functional theory (DFT) calculations were performed for the  $\text{Ti}_3\text{-BPDC-CoCl}$  system using the Gaussian 09 software suite, version E01. These complexes were optimized in gas phase at the level of B3LYP/6-311G(d,p) theory. Charge distribution was analyzed by natural population analysis (NPA).

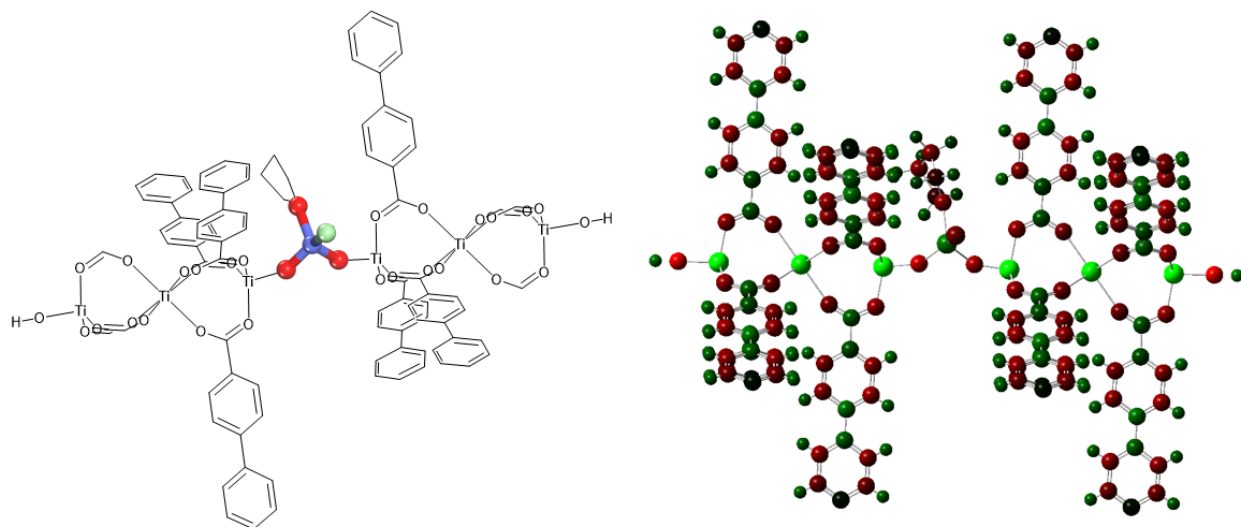

**Figure S16.** Optimized structure and calculated NBO charge distribution of the  $\text{Ti}_3\text{-BPDC-CoCl}$  fragment. Positively and negatively charged atoms are denoted by green and red colors, respectively.

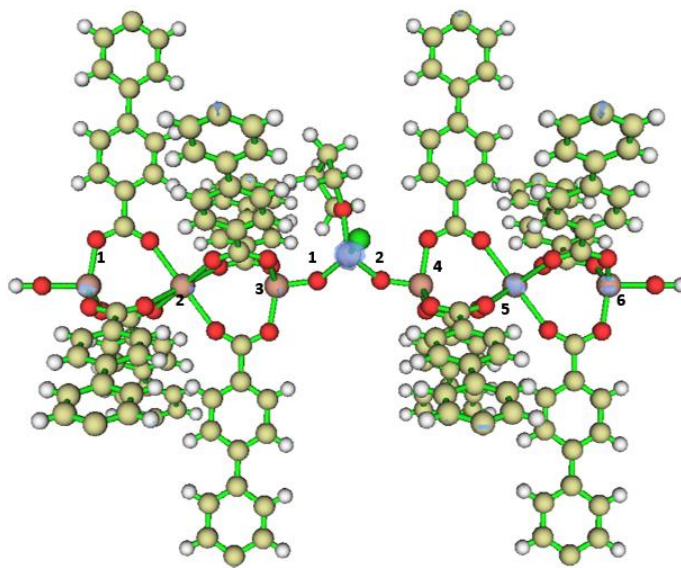

**Figure S17.** Spin density plot of the Ti<sub>3</sub>-BPDC-CoCl fragment. The Co center have a spin density of 2.63.

**Table S4:** NBO charges and spin densities of selected fragment of Ti<sub>3</sub>-BPDC-CoCl

|                        | <b>NBO Charge</b> | <b>Spin Density</b> |
|------------------------|-------------------|---------------------|
| <b>Co</b>              | 1.865827          | 2.634291            |
| <b>Cl</b>              | -0.96919          | 0.084018            |
| <b>Ti1</b>             | 1.367511          | 0.249355            |
| <b>Ti2</b>             | 0.9941            | -0.01926            |
| <b>Ti3</b>             | 1.399822          | 0.022101            |
| <b>Ti4</b>             | 1.421932          | 0.018162            |
| <b>Ti5</b>             | 1.001047          | 0.018605            |
| <b>Ti6</b>             | 1.365814          | -0.12666            |
| <b>O1</b>              | -0.92619          | 0.223447            |
| <b>O2</b>              | -0.79653          | 0.203426            |
| <b>O<sup>THF</sup></b> | -0.67355          | 0.019917            |

#### 4.6 EXAFS Fitting Using the DFT optimized Ti<sub>3</sub>-BPDC-CoCl Structure

X-ray absorption data of Ti<sub>3</sub>-BPDC-CoCl was collected at Beamline 10-BM at the Advanced Photon Source (APS) at Argonne National Laboratory. Spectra were collected at the cobalt K-edge (7709 eV) in transmission mode. The X-ray beam was monochromatized by a Si(111) monochromater and detuned by 50% to reduce the contribution of higher-order harmonics below the level of noise. A metallic cobalt foil standard was used as a reference for energy calibration and was measured simultaneously with experimental samples. The incident ( $I_0$ ), transmitted ( $I_t$ ), and reference ( $I_r$ ) beam intensities were measured by 20 cm ionization chambers with gas compositions

of 63% N<sub>2</sub> and 37% He, 73% N<sub>2</sub> and 27% Ar, and 100% N<sub>2</sub>, respectively. Data was collected over three regions: -200 to -20 eV (10 eV step size, integration time of 1.00 s), -20 to -50 eV (1 eV step size, integration time of 1.0 s), 50 eV to 14.98 Å<sup>-1</sup> k (0.05 k step size, integration time of 1 s). Three X-ray absorption spectra were collected at room temperature for each sample. Samples were ground and mixed with polyethyleneglycol (PEG) and packed in a 6-shooter sample holder to achieve adequate absorption length.

Data was processed using the Athena and Artemis programs of the IFEFFIT package based on FEFF 6.<sup>16, 17</sup> Prior to merging, spectra were calibrated against the reference spectra and aligned to the first peak in the smoothed first derivative of the absorption spectrum, the background noise was removed, and the spectra were processed to obtain a normalized unit edge step. Fitting results are shown in Figure 1c. For fitting parameters, see Table S5.

**Table S5.** Summary of EXAFS fitting parameters for Ti<sub>3</sub>-BPDC-CoCl

| <b>Ti<sub>3</sub>-BPDC-CoCl</b>    |               | <b>Fitting Range</b>                       | k: 2.9 – 11.5 Å <sup>-1</sup><br>R: 1 – 5 Å |
|------------------------------------|---------------|--------------------------------------------|---------------------------------------------|
| <b>Independent Points</b>          | 13            | <b>Variables</b>                           | 7                                           |
| <b>Reduced chi-square</b>          | 545           | <b>R-factor</b>                            | 0.015                                       |
| <b>ΔE<sub>0</sub>(eV)</b>          | -9.36         | <b>S<sub>0</sub><sup>2</sup></b>           | 1.05                                        |
| <b>R(Co-O<sup>μ</sup>-OH1) (1)</b> | 1.89 ± 0.03 Å | <b>σ<sup>2</sup>(Co-O<sup>μ</sup>-OH1)</b> | 0.004 ± 0.001                               |
| <b>R(Co-O<sup>μ</sup>-OH2) (1)</b> | 1.96 ± 0.03 Å | <b>σ<sup>2</sup>(Co-O<sup>μ</sup>-OH2)</b> | 0.004 ± 0.001                               |
| <b>R(Co-O<sup>THF</sup>) (1)</b>   | 2.06 ± 0.03 Å | <b>σ<sup>2</sup>(Co-O<sup>THF</sup>)</b>   | 0.004 ± 0.001                               |
| <b>R(Co-Cl) (1)</b>                | 2.33 ± 0.08 Å | <b>σ<sup>2</sup>(Co-Cl)</b>                | 0.010 ± 0.005                               |

#### 4.7 Synthesis of Ti<sub>3</sub>-BPDC-CoH

In a glovebox, Ti<sub>3</sub>-BPDC-CoCl (5 μmol Co) in 1 mL toluene was dropwisely added NaBEt<sub>3</sub>H (1.0 M in toluene, 0.05 ml, 10 equiv. to μ-OCoCl). The color of the suspension immediately changed from deep blue to black. After stirring at room temperature for 3 h, a black solid was collected after centrifugation and washed with toluene three times.

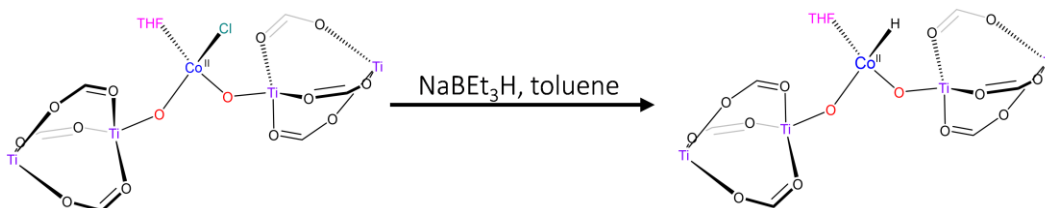

**Figure S18.** Conversion of Ti<sub>3</sub>-BPDC-CoCl to Ti<sub>3</sub>-BPDC-CoH.

#### 4.8 X-ray Fluorescence Analysis before and after Cl/H Exchange

To provide further evidence for Cl/H exchange, X-ray fluorescence analysis was performed on Ti<sub>3</sub>-BPDC-CoCl (before NaBEt<sub>3</sub>H activation) and Ti<sub>3</sub>-BPDC-CoH (after NaBEt<sub>3</sub>H activation). As shown in Figure S19, the intensity of Cl in the MOF sample dropped significantly after Cl/H exchange; 96.5% of Cl in the Ti<sub>3</sub>-BPDC-CoCl sample had disappeared after NaBEt<sub>3</sub>H activation and washing with solvents. The Co and Ti signals remained relatively unchanged before and after Cl/H exchange. X-ray fluorescence analysis thus showed that Co-Cl was nearly completely transformed into Co-H through Cl/H exchange after NaBEt<sub>3</sub>H activation.

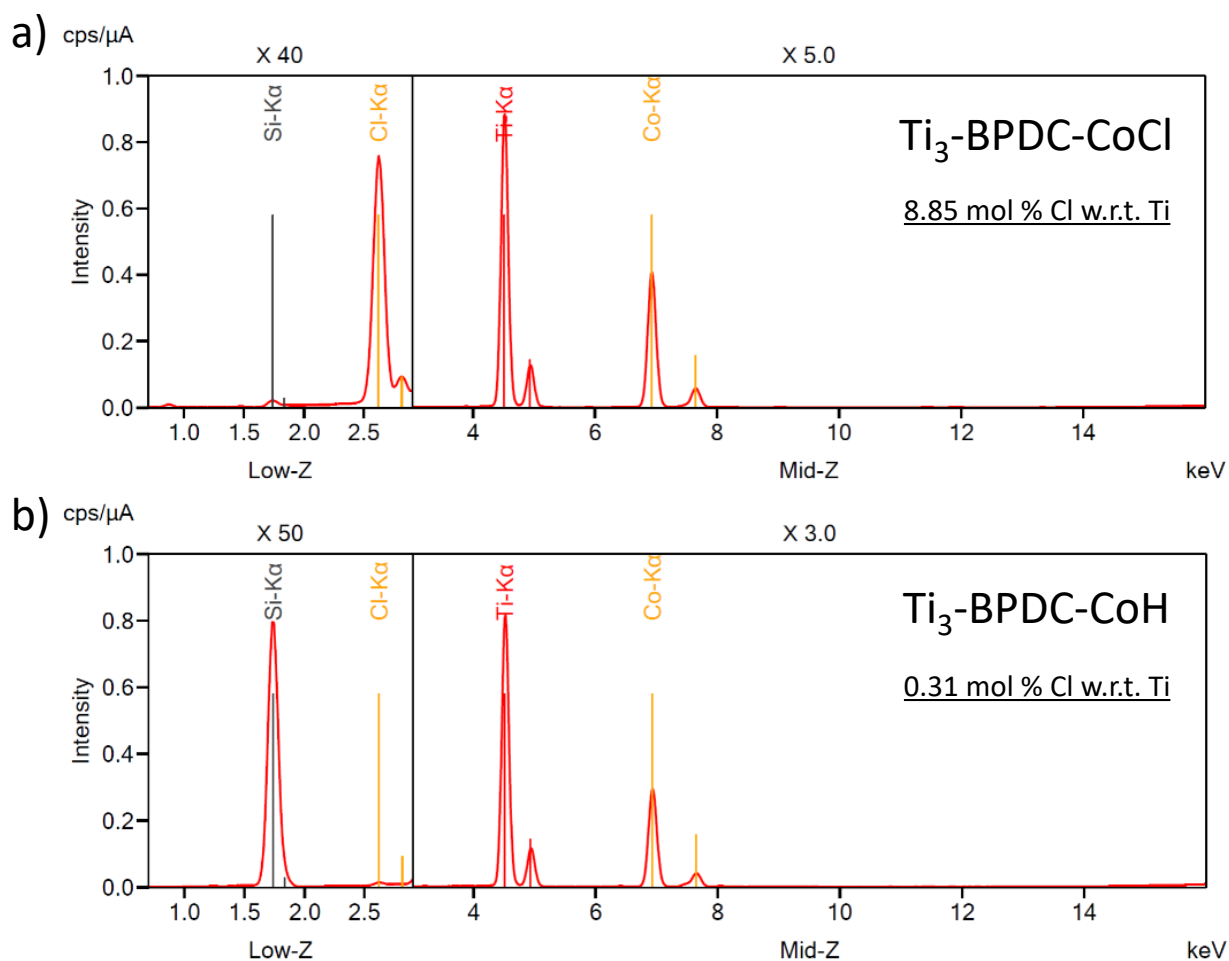

**Figure S19.** X-ray Fluorescence Spectra of a)  $\text{Ti}_3\text{-BPDC-CoCl}$ ; b)  $\text{Ti}_3\text{-BPDC-CoH}$ .

#### 4.9 Quantification of Hydrogen Produced from Protonation of $\text{Ti}_3\text{-BPDC-CoH}$

In a J. Young tube,  $\text{Ti}_3\text{-BPDC-CoH}$  (5  $\mu\text{mol}$  of Co) in 1 mL toluene was treated with formic acid (0.9  $\mu\text{L}$ , 50  $\mu\text{mol}$ ) and immediately sealed. After reacting at room temperature for 1 h, the head space gas was analyzed with GC to quantify the amount of  $\text{H}_2$ . Consistent results were obtained in three runs. The amount of  $\text{H}_2$  was calculated to be  $4.8 \pm 0.21$   $\mu\text{mol}$  (expected 5  $\mu\text{mol}$ ).

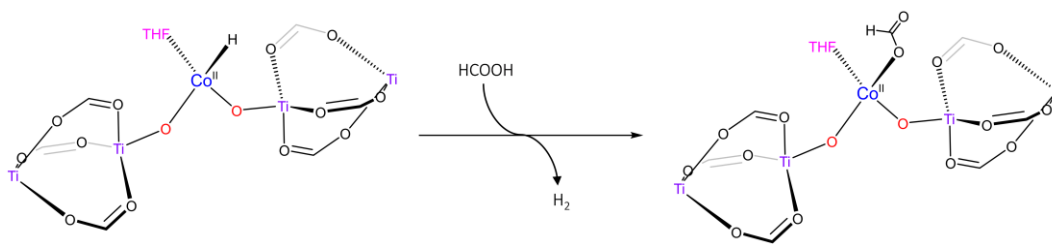

**Figure S20.** Hydrogen quantification of  $\text{Ti}_3\text{-BPDC-CoH}$ .

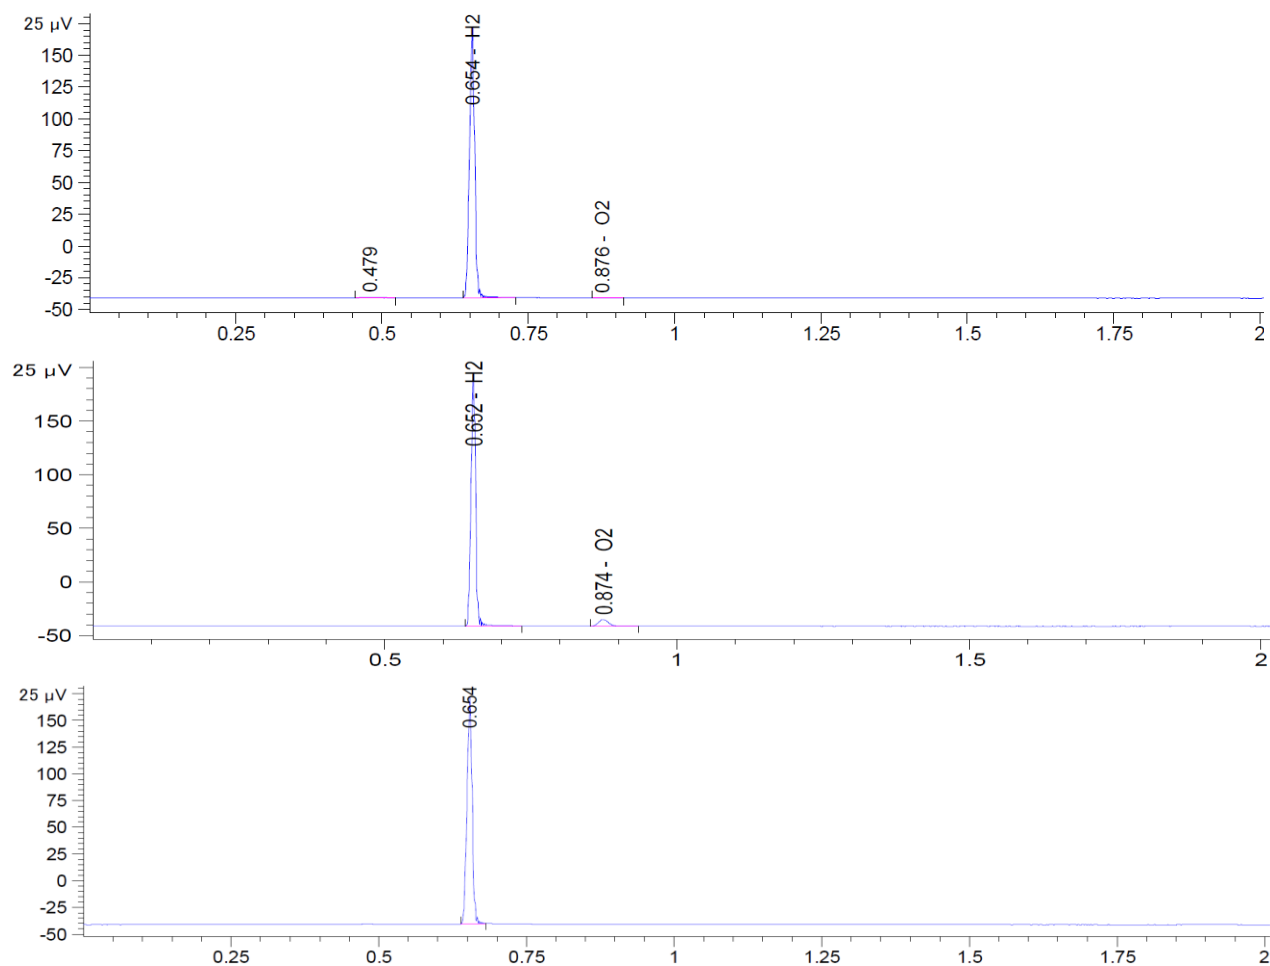

**Figure S21.** GC traces of  $\text{H}_2$  evolved from protonation of  $\text{Ti}_3\text{-BPDC-CoH}$  with formic acid.

#### 4.10 DFT Study on $\text{Ti}_3\text{-BPDC-CoH}$



DFT calculations were performed on the  $\text{Ti}_3$ -BPDC-CoH system using the Gaussian 09 software suite, version E01. These complexes were optimized in gas phase at the level of B3LYP/6-311G(d,p) theory. Charge distribution was analyzed by natural population analysis (NPA).

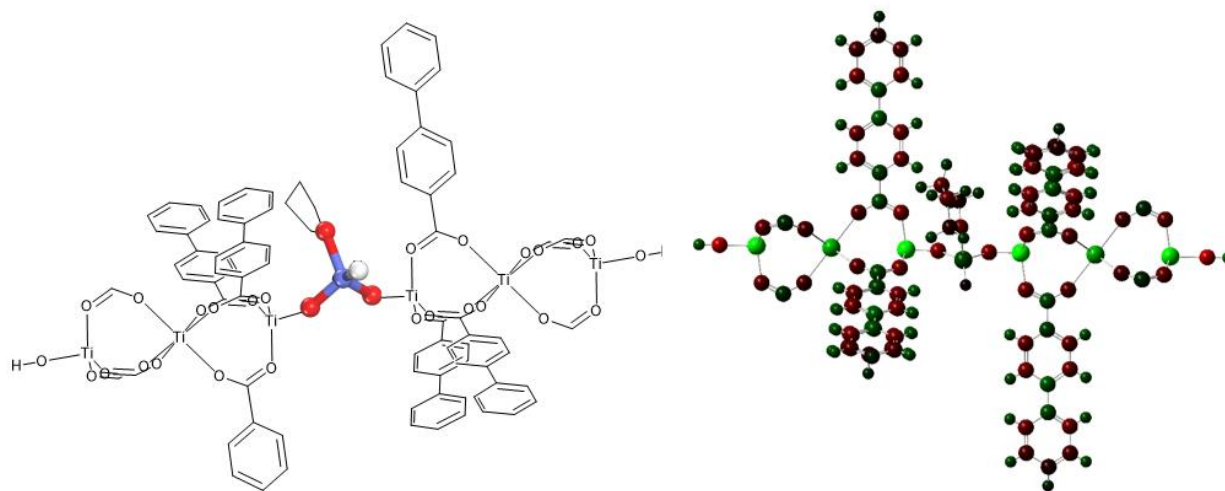

**Figure S22.** Optimized structure and calculated NBO charge distribution of the  $\text{Ti}_3$ -BPDC-CoH fragment. Positively and negatively charged atoms are denoted by green and red colors, respectively.

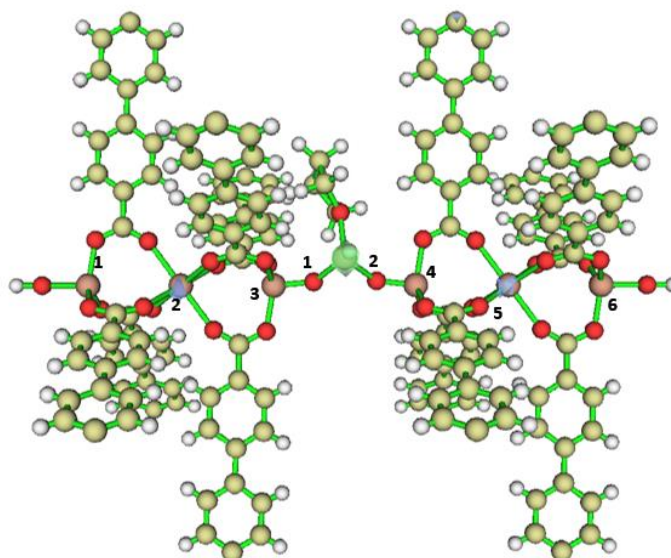

**Figure S23.** Spin density plot of the  $\text{Ti}_3$ -BPDC-CoH fragment. The Co center have a spin density of 2.71.

**Table S6.** NBO charges and spin density of selected fragment of Ti<sub>3</sub>-BPDC-CoH

|                        | <b>NBO Charge</b> | <b>Spin Density</b> |
|------------------------|-------------------|---------------------|
| <b>Co</b>              | 1.524053          | 2.708781            |
| <b>H</b>               | -0.12265          | 0.109252            |
| <b>Ti1</b>             | 1.364181          | -0.853238           |
| <b>Ti2</b>             | 0.992719          | -1.893773           |
| <b>Ti3</b>             | 1.355309          | -0.452716           |
| <b>Ti4</b>             | 1.389321          | -0.098868           |
| <b>Ti5</b>             | 0.996685          | 0.742935            |
| <b>Ti6</b>             | 1.36406           | -0.878587           |
| <b>O1</b>              | -0.94482          | 0.073799            |
| <b>O2</b>              | -0.91201          | 0.024723            |
| <b>O<sup>THF</sup></b> | -0.85278          | 0.030206            |

#### 4.11 EXAFS Fitting Using the DFT optimized Ti<sub>3</sub>-BPDC-CoH Structure

X-ray absorption data of Ti<sub>3</sub>-BPDC-CoH was collected and processed using identical protocol as Ti<sub>3</sub>-BPDC-CoCl at 10-BM at Advanced Photon Source (APS) at Argonne National Laboratory. Fitting results are shown in Figure 2b. For fitting parameters, see Table S7.

**Table S7.** Summary of EXAFS fitting parameters for Ti<sub>3</sub>-BPDC-CoH

| <b>Ti<sub>3</sub>-BPDC-CoH</b> |   | <b>Fitting Range</b> | k: 3 – 8.20 Å <sup>-1</sup><br>R: 1.1 – 3.8 Å |
|--------------------------------|---|----------------------|-----------------------------------------------|
| <b>Independent Points</b>      | 9 | <b>Variables</b>     | 6                                             |

|                                           |                   |                                          |                   |
|-------------------------------------------|-------------------|------------------------------------------|-------------------|
| <b>Reduced chi-square</b>                 | 355               | <b>R-factor</b>                          | 0.008             |
| $\Delta E_0(\text{eV})$                   | -3.06             | $S_0^2$                                  | 1.05              |
| <b>R(Co-O<math>^{\mu}</math>-OH1) (1)</b> | 1.97 $\pm$ 0.04 Å | $\sigma^2(\text{Co-O}^{\mu}\text{-OH1})$ | 0.004 $\pm$ 0.001 |
| <b>R(Co-O<math>^{\mu}</math>-OH2) (1)</b> | 2.00 $\pm$ 0.04 Å | $\sigma^2(\text{Co-O}^{\mu}\text{-OH2})$ | 0.004 $\pm$ 0.001 |
| <b>R(Co-O<sup>THF</sup>) (1)</b>          | 2.07 $\pm$ 0.04 Å | $\sigma^2(\text{Co-O}^{\text{THF}})$     | 0.004 $\pm$ 0.001 |
| <b>R(Co-H) (1)</b>                        | 1.61 $\pm$ 0.10 Å | $\sigma^2(\text{Co-H})$                  | 0.002 $\pm$ 0.000 |

## 5. Ti<sub>3</sub>-BPDC-CoH Catalyzed Cascade Reduction of Pyridines

### 5.1 Substrate Synthesis

#### 5.1.1 3-Phenylpyridines derivatives

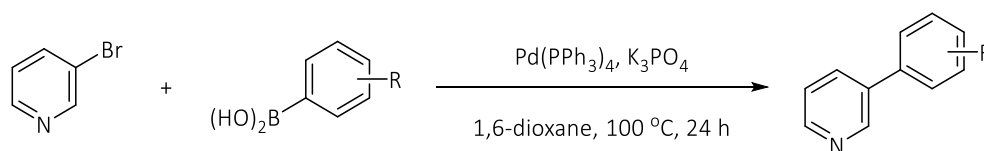

3-Phenylpyridines derivatives were synthesized by Suzuki coupling reactions. Phenylboronic acid with different substituents (6.0 mmol), tetrakis(triphenylphosphine)palladium(0) (289 mg, 0.25 mmol), and K<sub>3</sub>PO<sub>4</sub> (3.18 g, 15 mmol) were charged into a dry round-bottom flask and dried under vacuum for 10 min. Degassed 1,4-dioxane (30 mL) and 3-bromopyridine (0.48 mL, 790 mg, 5.0 mmol) were then added to the flask via a syringe. The mixture was stirred under N<sub>2</sub> at 100 °C for 24 h. After cooling to room temperature, the crude product was dispersed in 100 mL of H<sub>2</sub>O, extracted with CH<sub>2</sub>Cl<sub>2</sub> (30 mL  $\times$  4), and dried with Na<sub>2</sub>SO<sub>4</sub>. Pure 3-phenylpyridines were obtained after chromatography using hexane:ethyl acetate = 10:1(v/v) as eluant. The <sup>1</sup>H NMR and <sup>13</sup>C NMR data of the products are consistent with those reported in literatures.

**3-(*p*-tolyl)pyridine.**<sup>18</sup> (CAS: 4423-09-0) White/pale yellow solid. Yield: 78%. <sup>1</sup>H NMR (500 MHz, Chloroform-*d*):  $\delta$  8.85 (dd,  $J = 2.4, 0.9$  Hz, 1H), 8.57 (dd,  $J = 4.8, 1.6$  Hz, 1H), 7.91 (ddd,  $J = 7.9, 2.4, 1.6$  Hz, 1H), 7.51 – 7.47 (m, 2H), 7.39 (ddd,  $J = 7.9, 4.8, 0.9$  Hz, 1H), 7.32 – 7.28 (m, 1H), 2.42 (s, 3H). <sup>13</sup>C NMR (126 MHz, Chloroform-*d*):  $\delta$  148.15, 148.12, 138.19, 136.79, 134.97, 134.36, 129.93, 127.09, 123.70, 21.28.

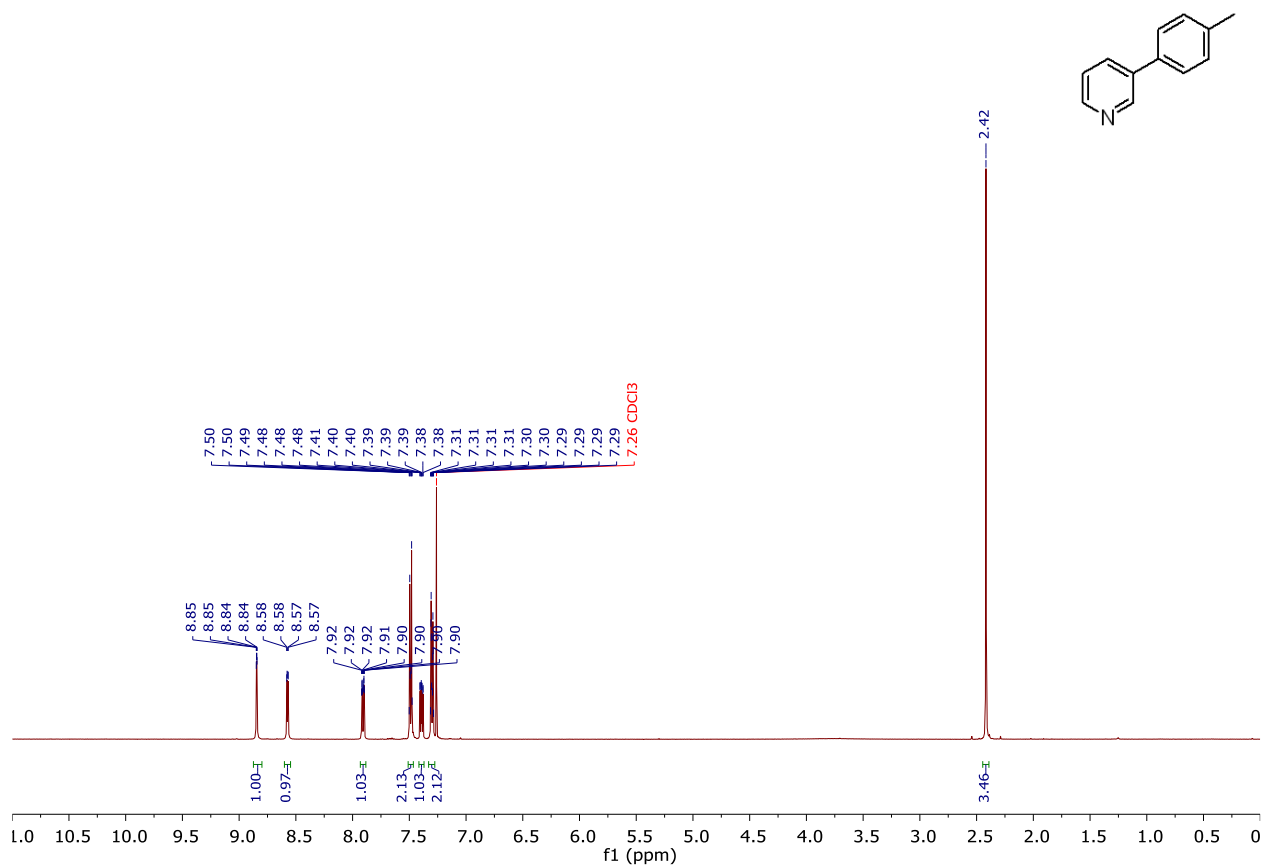

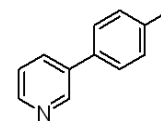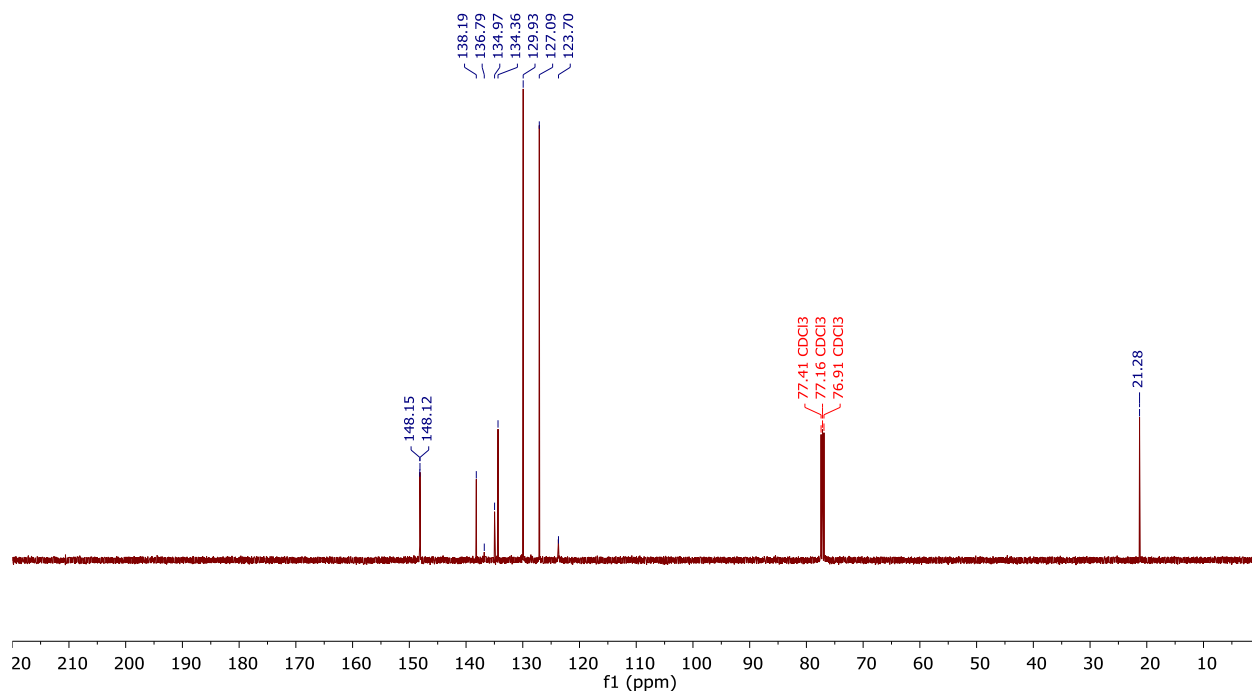

**Figure S24.**  $^1\text{H}$  NMR and  $^{13}\text{C}$  NMR spectrum of 3-(*p*-tolyl)pyridine.

**3-(*m*-tolyl)pyridine.**<sup>18</sup> (CAS: 4385-67-5) Colorless liquid. Yield: 90%.  $^1\text{H}$  NMR (500 MHz, Chloroform-*d*):  $\delta$  8.85 (dd,  $J = 2.4, 0.9$  Hz, 1H), 8.59 (dd,  $J = 4.8, 1.6$  Hz, 1H), 7.90 (ddd,  $J = 7.9, 2.4, 1.6$  Hz, 1H), 7.41 – 7.36 (m, 4H), 7.25 – 7.22 (m, 1H), 2.44 (s, 3H).  $^{13}\text{C}$  NMR (126 MHz, Chloroform-*d*):  $\delta$  148.31, 138.90, 137.86, 136.98, 134.62, 129.11, 129.00, 128.03, 124.37, 123.70, 21.64.

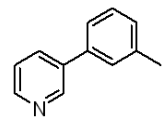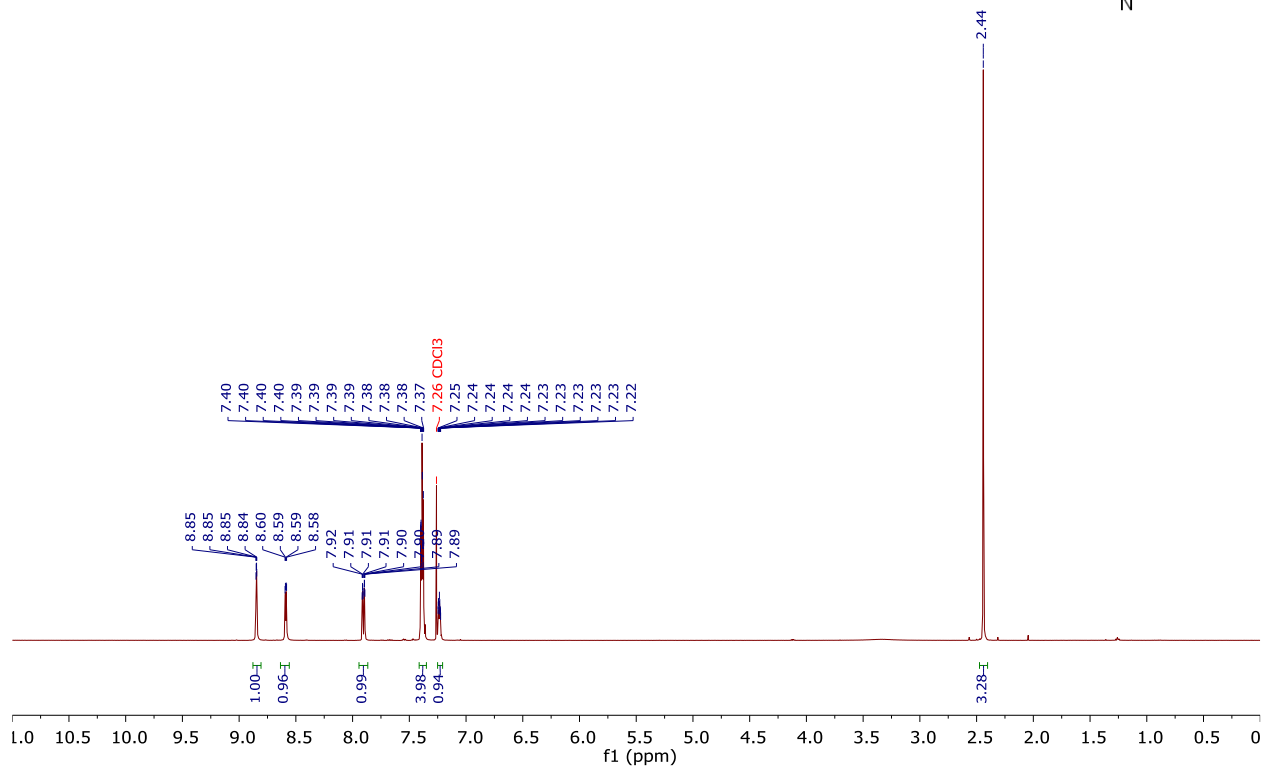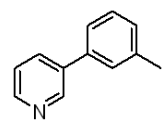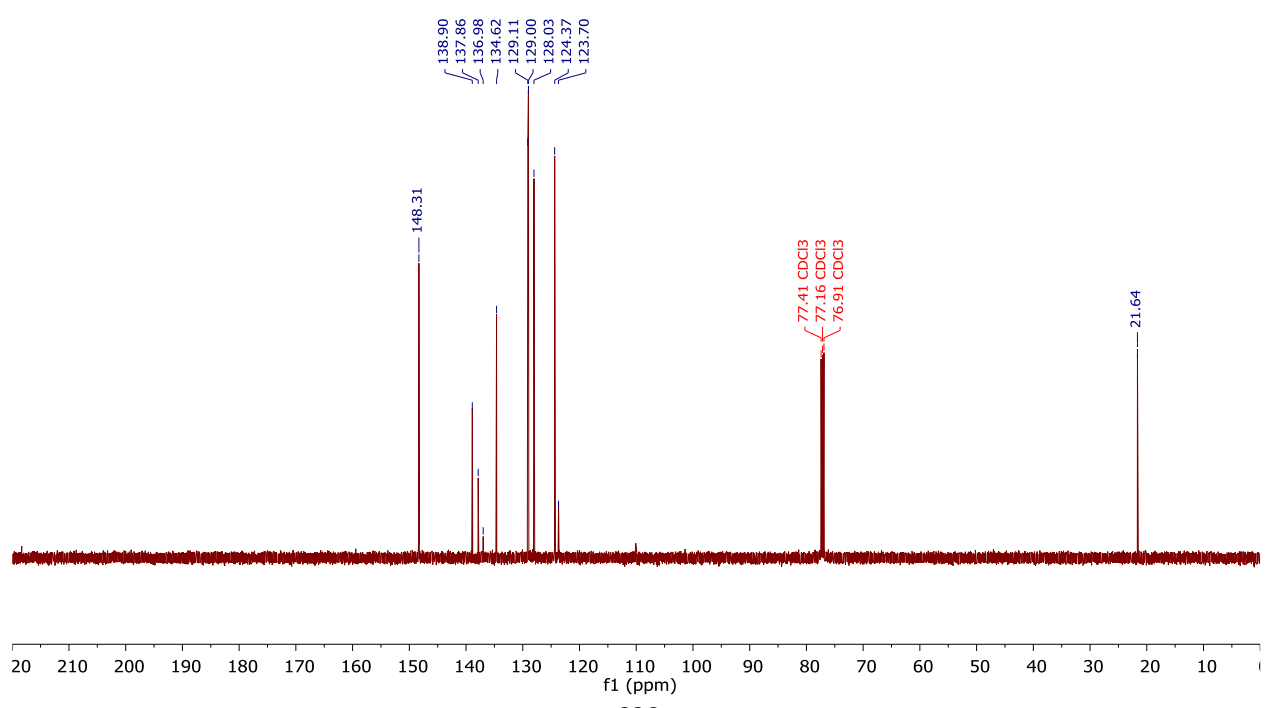

**Figure S25.**  $^1\text{H}$  NMR and  $^{13}\text{C}$  NMR spectrum of 3-(*m*-tolyl)pyridine.

**3-(*o*-tolyl)pyridine.<sup>19</sup>** (CAS: 90395-49-6) Colorless liquid. Yield: 93%.  $^1\text{H}$  NMR (500 MHz, Chloroform-*d*):  $\delta$  8.65-8.58 (m, 2H), 7.74 (ddd,  $J = 7.8, 2.3, 1.7$  Hz, 1H), 7.43 (ddd,  $J = 7.8, 5.0, 0.9$  Hz, 1H), 7.35 – 7.27 (m, 3H), 7.22 (ddd,  $J = 7.2, 1.3$  Hz, 1H), 2.28 (s, 3H).  $^{13}\text{C}$  NMR (126 MHz, Chloroform-*d*):  $\delta$  149.72, 147.88, 138.04, 137.75, 136.96, 135.71, 130.73, 129.99, 128.33, 126.25, 123.27, 20.50.

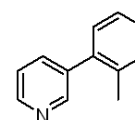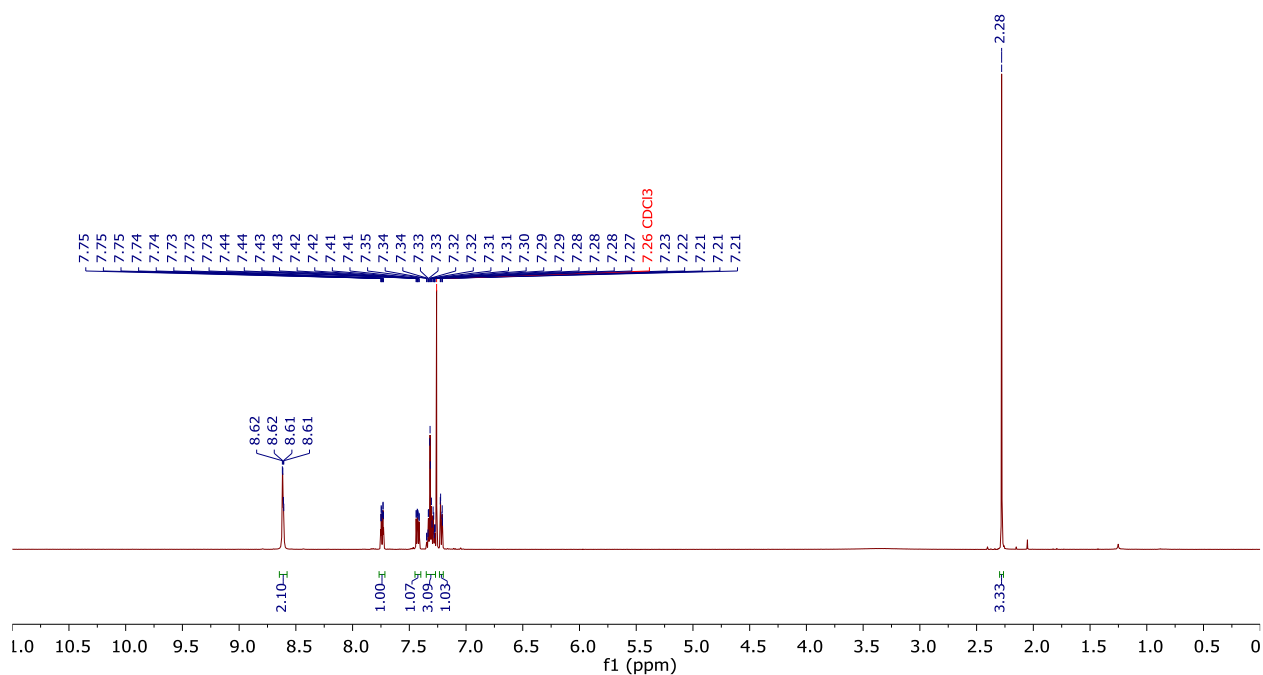

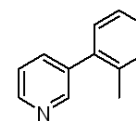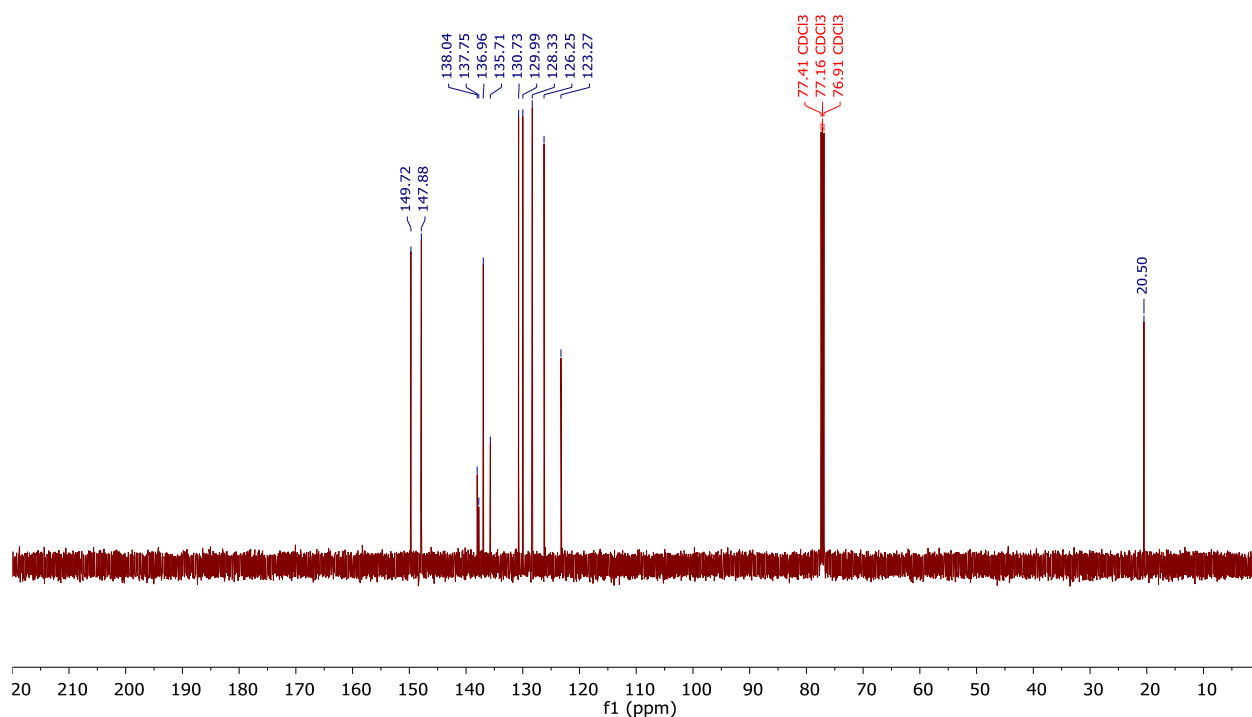

**Figure S26.**  $^1\text{H}$  NMR and  $^{13}\text{C}$  NMR spectrum of 3-(*o*-tolyl)pyridine.

### 5.1.2 1,2/1,4-Hydroboration adducts of pyridine and 6-methoxyquinoline

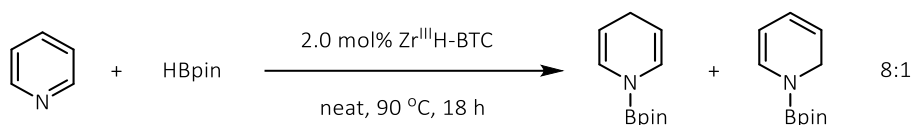

$\text{Zr}^{\text{III}}\text{H-BTC}$  (0.04 mmol Zr) was prepared according to the literature.<sup>20</sup> Pyridine (160  $\mu\text{L}$ , 2.0 mmol) was then added to a mixture of  $\text{Zr}^{\text{III}}\text{H-BTC}$  and pinacolborane (319  $\mu\text{L}$ , 2.2 mmol). The reaction mixture was stirred under  $\text{N}_2$  at 90  $^\circ\text{C}$  for 18 h. The MOF was removed from the solution by filtration. The supernatant was concentrated in vacuo to afford a mixture of 1-(4,4,5,5-tetramethyl-1,3,2-dioxaborolan-2-yl)-1,4-dihydropyridine (1,4-adduct, 1.78 mmol, 89% NMR yield based on mesitylene as an internal standard) and 1-(4,4,5,5-tetramethyl-1,3,2-dioxaborolan-



2-yl)-1,2-dihydropyridine (1,2-adduct, 0.22 mmol, 11% NMR yield based on mesitylene as an internal standard). The  $^1\text{H}$  NMR peaks correspond well to the reported data.

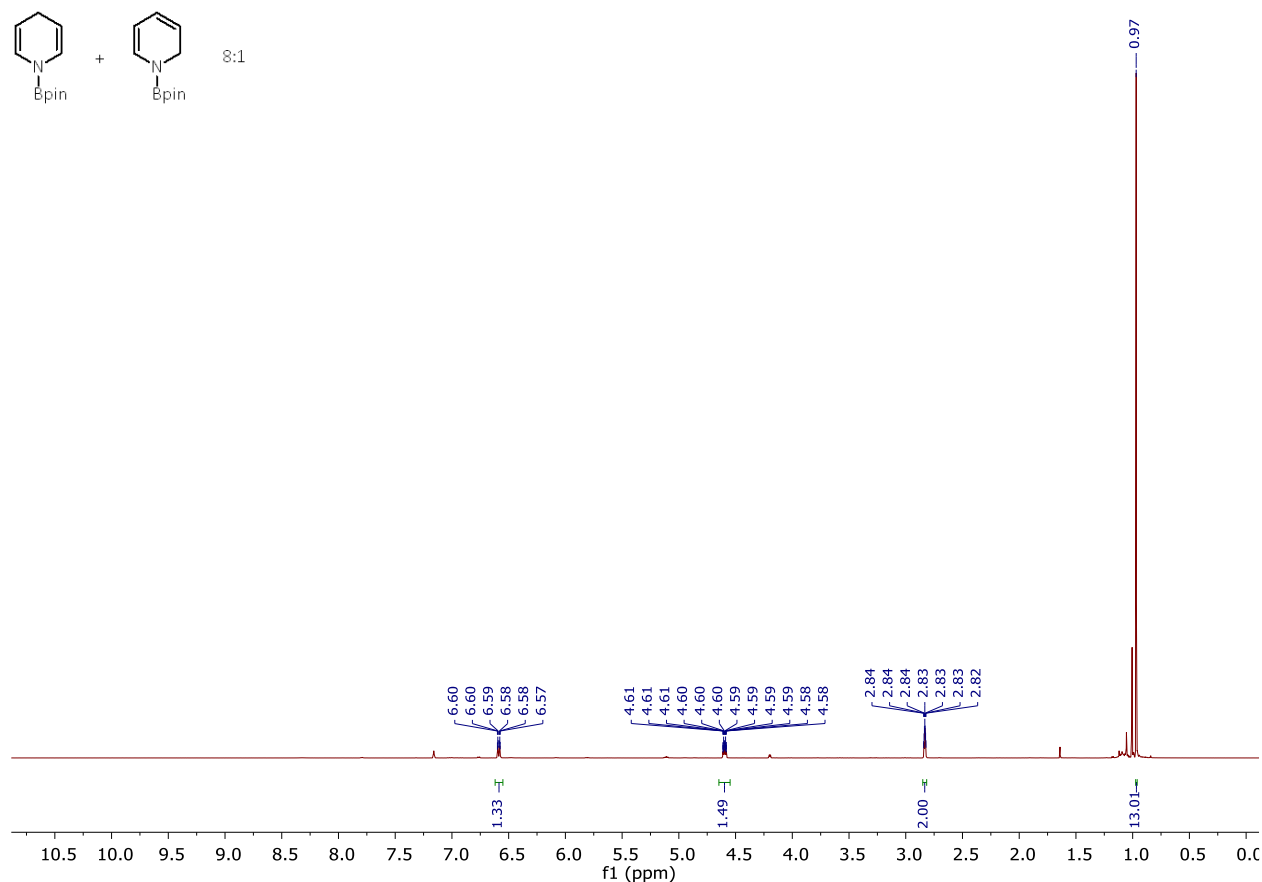

**Figure S27.**  $^1\text{H}$  NMR spectrum of  $\text{Zr}^{\text{III}}$ -BTC catalyzed pyridine hydroboration product.

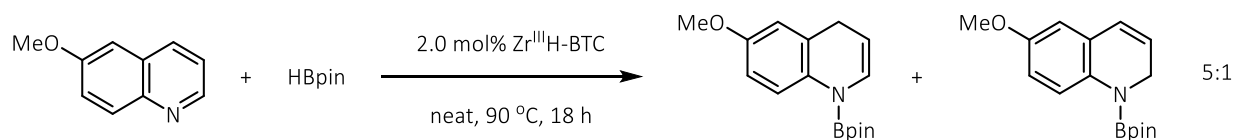

6-Methoxyquinoline (276  $\mu\text{L}$ , 2.0 mmol) was added to a mixture of  $\text{Zr}^{\text{III}}\text{H-BTC}$  (0.04 mmol Zr) and pinacolborane (319  $\mu\text{L}$ , 2.2 mmol). The reaction mixture was stirred under  $\text{N}_2$  at 90 °C for 18 h. The MOF was removed from the solution by filtration. The supernatant was concentrated in vacuo to afford a mixture of 6-methoxy-1-(4,4,5,5-tetramethyl-1,3,2-dioxaborolan-2-yl)-1,4-dihydroquinoline (1,4-adduct, 1.67 mmol, 83% NMR yield based on mesitylene as an internal standard) and 6-methoxy-1-(4,4,5,5-tetramethyl-1,3,2-dioxaborolan-2-yl)-1,2-dihydroquinoline

(1,2-adduct, 0.33 mmol, 17% NMR yield based on mesitylene as an internal standard). The  $^1\text{H}$  NMR peaks correspond well to the reported data.

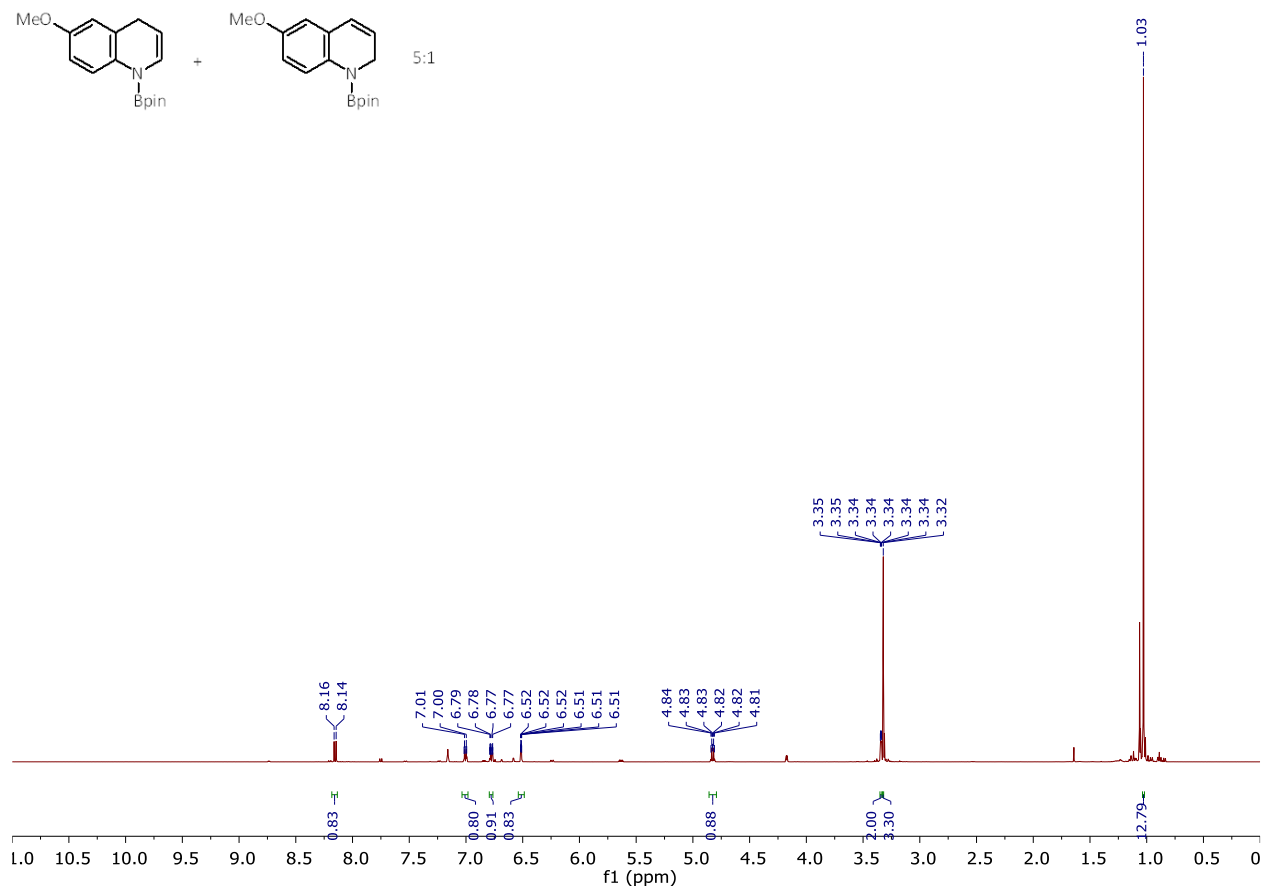

**Figure S28.**  $^1\text{H}$  NMR spectrum of  $\text{Zr}^{\text{III}}$ -BTC catalyzed 6-methoxyquinoline hydroboration product.

## 5.2 Condition optimization and control experiments of $\text{Ti}_3$ -BPDC-CoH catalyzed cascade reduction of pyridines.

Early trials of  $\text{Ti}_3$ -BPDC-CoH catalyzed cascade reduction of 3-picoline were conducted at 0.5% cat. Loading in 1 mL octane as solvent, with 3.00 equiv. of HBpin, 50 bar  $\text{H}_2$  pressure, at 100 °C for 22 hrs. Over 99% of 3-methylpiperidine was detected by GC-MS using mesitylene as internal standard. Later experiments (Entry 2-6, Table S8) showed that 0.2% cat. loading, 1.05 equiv. of HBpin and 20 bar  $\text{H}_2$  was required to achieve good yield (>95%). Dramatic yield drop was observed when the solvent was changed to either THF, Toluene, or neat condition (Entry

7,8,12, Table S8). Decrease the temperature to 80 °C afforded no product (Entry 9, Table S8). The maximum TON was achieved at 0.05 mol% catalyst loading for 3 days, with TON = 1980.

**Table S8.** Optimization of conditions for Ti<sub>3</sub>-BPDC-CoH catalyzed cascade reduction using 3-picoline as substrate.<sup>a</sup>

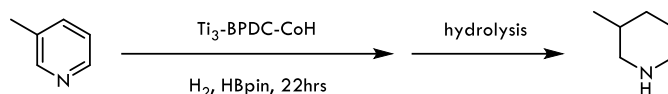

| Entry           | Cat. Loading / % | Solvent | HBpin equivalent | H <sub>2</sub> pressure / bar | Temp. / °C | Yield / % |
|-----------------|------------------|---------|------------------|-------------------------------|------------|-----------|
| 1               | 0.5              | Octane  | 3.00             | 50                            | 100        | >99       |
| 2               | 0.2              | Octane  | 3.00             | 50                            | 100        | >99       |
| 3               | 0.2              | Octane  | 1.05             | 20                            | 100        | 97        |
| 4               | 0.2              | Octane  | 0.30             | 50                            | 100        | 26        |
| 5               | 0.05             | Octane  | 1.05             | 20                            | 100        | 65        |
| 6               | 0.05             | Octane  | 1.05             | 5                             | 100        | 2         |
| 7               | 0.2              | THF     | 1.05             | 20                            | 100        | 4         |
| 8               | 0.2              | Toluene | 1.05             | 20                            | 100        | 10        |
| 9               | 0.2              | Octane  | 1.05             | 20                            | 80         | 0         |
| 10              | 0.2              | Octane  | 1.05             | 20                            | 120        | >99       |
| 11 <sup>b</sup> | 0.05             | Octane  | 1.05             | 20                            | 100        | 99        |
| 12              | 0.01             | neat    | 1.05             | 50                            | 100        | 0         |

<sup>a</sup>Reaction conditions: Ti<sub>3</sub>-BPDC-CoH (Loading w.r.t. Co), 0.5 mmol 3-picoline, 0 ~ 3.0 equiv. pinacolborane, 20 ~ 50 bar H<sub>2</sub>, 1 mL Solvent; Yield was determined by GC-MS analysis, mesitylene as internal standard. <sup>b</sup>Reaction time: 3 days.

Background reactions and HBpin/H<sub>2</sub> control experiments were conducted for the Ti<sub>3</sub>-BPDC-CoH catalyzed cascade reduction. The reaction did not proceed in the absence of either Ti<sub>3</sub>-BPDC-CoH MOF or HBpin, even when the H<sub>2</sub> pressure was increased to 50 bar (Entry 1-2, Table S9). In the absence of H<sub>2</sub>, 1,4- and 1,2-hydroboration products were obtained, but the TON was significantly lower than that of the cascade reduction. At 2.0 mol% of Co loading with 1.5 equiv. of HBpin, 15% of 1,4-hydroborated 3-picoline and 10% of 1,2-hydroborated 3-picoline

were obtained in 22 hours based on  $^1\text{H}$  NMR analysis (Entry 3, Table S9). These results indicate that the catalyst ( $\text{Ti}_3\text{-BPDC-CoH}$ ), HBpin, and  $\text{H}_2$  are essential for the catalytic cascade process and the coupling of the hydrogenation step promotes the cascade reduction by pushing the equilibrium to the reduced product.

**Table S9.** Background reactions and HBpin/ $\text{H}_2$  control experiments for  $\text{Ti}_3\text{-BPDC-CoH}$  catalyzed cascade reduction using 3-picoline as substrate.<sup>a</sup>

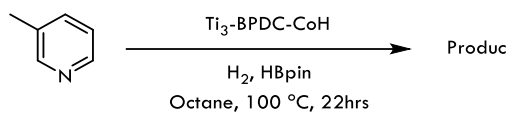

| Entry | Cat. Loading / % | HBpin equivalent | $\text{H}_2$ pressure / bar | Product                                                                                                                                                                                                                                                                                     |
|-------|------------------|------------------|-----------------------------|---------------------------------------------------------------------------------------------------------------------------------------------------------------------------------------------------------------------------------------------------------------------------------------------|
| 1     | 0.5              | 0                | 50                          | >99% of 3-picoline recovered <sup>a</sup><br><br>>99%                                                                                                                                                    |
| 2     | 0                | 3.00             | 50                          | >99% of 3-picoline recovered <sup>a</sup><br><br>>99%                                                                                                                                                   |
| 3     | 2.0              | 1.50             | 0                           | 15% of 1,4-hydroborated 3-picoline +<br>10% of 1,2-hydroborated 3-picoline <sup>b</sup><br> Bpin 15%<br> Bpin 10% |

<sup>a</sup>Yield was determined by GC-MS analysis, mesitylene as internal standard. <sup>b</sup>Yield was determined by  $^1\text{H}$  NMR analysis, mesitylene as internal standard.

To further prove that the Co-hydride sites supported on the  $\text{Ti}_3\text{-BPDC}$  MOF act as the real catalytic species in the cascade reduction of pyridines, a series of control experiments were conducted using different catalysts (Table S10). First,  $\text{Ti}_3\text{-BPDC-CoCl}$  was used as catalyst without first being treated with  $\text{NaBET}_3\text{H}$ . Under the same Co loading and reaction condition,  $\text{Ti}_3\text{-BPDC-CoCl}$  showed no activity in the cascade reduction of 3-picoline. Second, to rule out the

possibility of Ti sites in catalyzing the reaction, Ti<sub>3</sub>-BPDC was used as the catalyst with the same amount of Ti amount in Ti<sub>3</sub>-BPDC-CoH. No product was detected. Third, Co nanoparticles (NPs) were also applied in the cascade reduction. Co-NPs were obtained by treating CoCl<sub>2</sub>/THF solution with 10 eq. of NaBEt<sub>3</sub>H and washed with toluene three times and then added to the reactor. Co-NPs, at the same Co loading as Ti<sub>3</sub>-BPDC-CoH, showed no catalytic activity, further ruling out the possibility of leached Co species responsible for the cascade reduction product. Finally, 2 mol% of NaBEt<sub>3</sub>H was used as the catalyst but no product was obtained, excluding the possibility of trapped NaBEt<sub>3</sub>H in the MOF channel catalyzing the cascade reaction. These experiments rule out the possibility of potential leaching process (leading to Ti<sub>3</sub>-BPDC and Co-NPs) or the NaBEt<sub>3</sub>H being responsible for the cascade reduction product.

**Table S10.** Control experiments using different catalysts for cascade reduction of 3-picoline.<sup>a</sup>

| Entry          | Cat. Loading / %                       | Solvent | HBpin equivalent | H <sub>2</sub> pressure / bar | Yield / % |
|----------------|----------------------------------------|---------|------------------|-------------------------------|-----------|
| 1              | 0.2 mol%<br>Ti <sub>3</sub> -BPDC-CoH  | Octane  | 1.05             | 20                            | 97        |
| 2 <sup>b</sup> | 0.2 mol%<br>Ti <sub>3</sub> -BPDC-CoCl | Octane  | 1.05             | 20                            | 0         |
| 3 <sup>c</sup> | 0.6 mol%<br>Ti <sub>3</sub> -BPDC      | Octane  | 1.05             | 20                            | 0         |
| 4 <sup>d</sup> | 0.2 mol%<br>Co-NPs                     | Octane  | 1.05             | 20                            | 0         |
| 5 <sup>e</sup> | 2 mol%<br>NaBEt <sub>3</sub> H         | Octane  | 1.05             | 20                            | 0         |

<sup>a</sup>Reaction conditions: Ti<sub>3</sub>-BPDC-CoH (1 μmol Co) or other catalyst, 0.5 mmol 3-picoline, 0.525 mmol pinacolborane, 20 bar H<sub>2</sub>, 1 mL Octane, 100 °C, 22 hrs; Yield was determined by GC-MS analysis, mesitylene as internal standard. <sup>b</sup>Ti<sub>3</sub>-BPDC-CoCl (1 μmol Co), as prepared above, was used as catalyst without further treatment. <sup>c</sup>Ti<sub>3</sub>-BPDC (3 μmol Ti), as prepared above, was used as catalyst without further

treatment. <sup>d</sup>Co-NPs (1 μmol Co, black solid), generated by treating 1 μmol CoCl<sub>2</sub> (20 mM in THF) with 10 equiv. of NaBEt<sub>3</sub>H for 1 hour and washed 3 times with toluene, was used as catalyst. <sup>e</sup>NaBEt<sub>3</sub>H (10 μmol, 1.0 M in Hexane) was used as catalyst without further treatment.

### 5.3 A Typical Procedure for Ti<sub>3</sub>-BPDC-CoH Catalyzed Cascade Reduction of Pyridines

(Table 1).

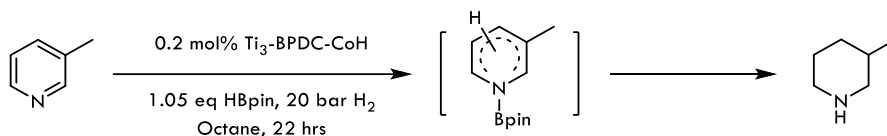

In a nitrogen-filled glovebox, Ti<sub>3</sub>-BPDC-CoCl (2.0 mg, 1.0 μmol Co) in 1.0 mL toluene was charged into a glass vial. NaBEt<sub>3</sub>H (10 μL, 1.0 M in Toluene) was added to the vial and the mixture was stirred for 1 hour. The solid was then centrifuged, washed with toluene three times, and washed with octane twice, before being transferred into a Parr reactor with 1 mL octane. 3-Picoline (49 μL, 0.50 mmol) and pinacolborane (77 μL, 0.525 mmol) was then added to the solution. The Parr reactor was sealed under nitrogen and charged with hydrogen to 20 bar. After stirring at 100 °C for 22 hours, the pressure was released and the MOF catalyst was removed from the reaction mixture via centrifugation. After being quenched with 2 drops of methanol, the supernatant was analyzed by GC-MS to give 3-methylpiperidine in 97% yield. 0.4% of Co leaching was determined by ICP-MS analysis of the organic extract from the reaction mixture, indicating minimal MOF decomposition during catalysis.

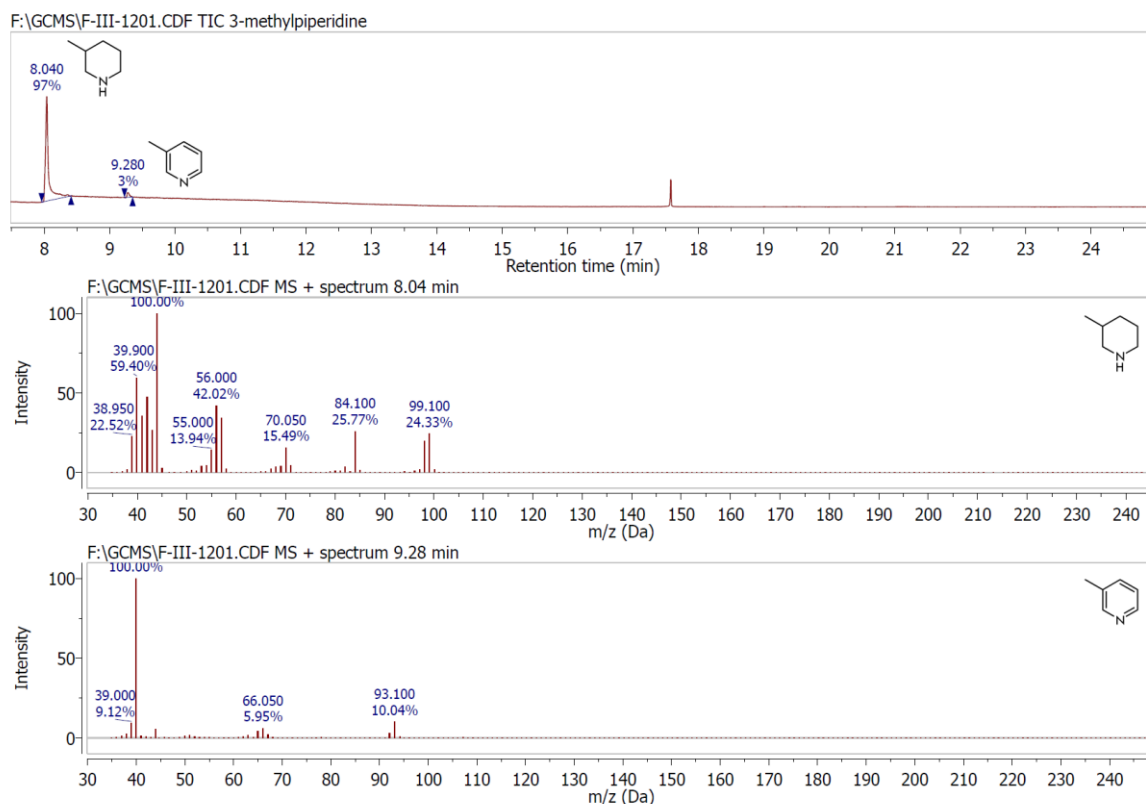

**Figure S29.** GC-MS spectrum of cascade reduction of 3-picoline to afford 3-methylpiperidine.

## 5.4 Reduction Pathway Study

Despite the fact that  $\text{Ti}_3\text{-BPDC-CoH}$  can catalyzed the hydroboration of 3-picoline in the absence of  $\text{H}_2$  (Entry 3, Table S9), further experiments were conduct to demonstrate the whole cascade reduction pathway. As shown in Figure S30, hydroboration products of pyridine and 6-methoxyquinoline were prepared separately (see SI 5.1.2) and used as starting materials in the second step of catalytic hydrogenation. **Without adding any HBpin**, hydroboration products of pyridine and 6-methoxyquinoline can be fully hydrogenated to give piperidine and 1,2,3,4s-tetrahydro-6-methoxyquinoline in quantitative yield under 0.5 mol% of  $\text{Ti}_3\text{-BPDC-CoH}$ , 20 bar  $\text{H}_2$  and 100 °C. Background reaction without adding MOF resulted in no conversion and fully recovery of pyridine and 6-methoxyquinoline after hydrolysis under air. Such result proved that after the hydroboration of *N*-heteroarenes catalyzed by  $\text{Ti}_3\text{-BPDC-CoH}$ , the hydroborated products were

readily to undergo catalytic direct hydrogenation of the remaining unsaturated bonds to afford the fully reduced *N*-heterocycles. The above evidents strongly support our propose of cascade pathway in the reduction process of *N*-heteroarenes.

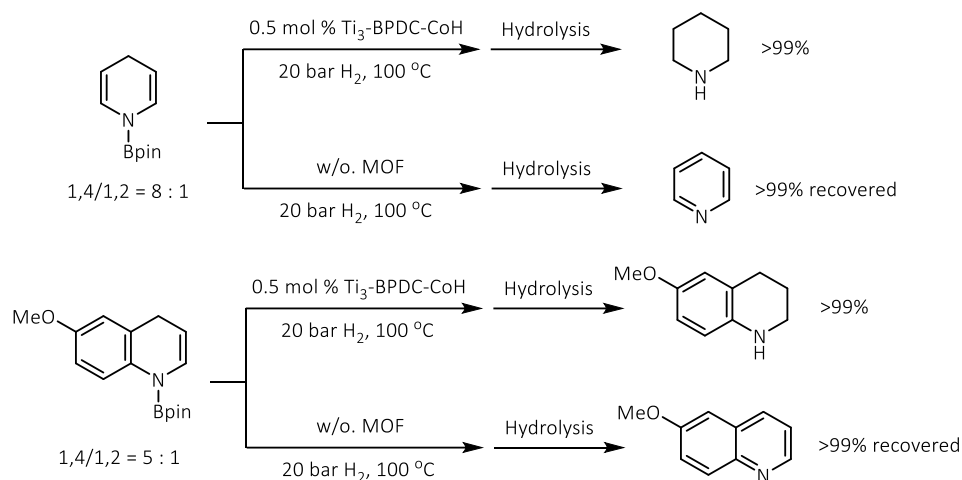

**Figure S30.** Control experiment using hydroborated pyridine and quinoline as starting materials.<sup>20</sup> The yield is based on GC-MS using mesitylene as internal standard.

### 5.5 Recycling Experiment

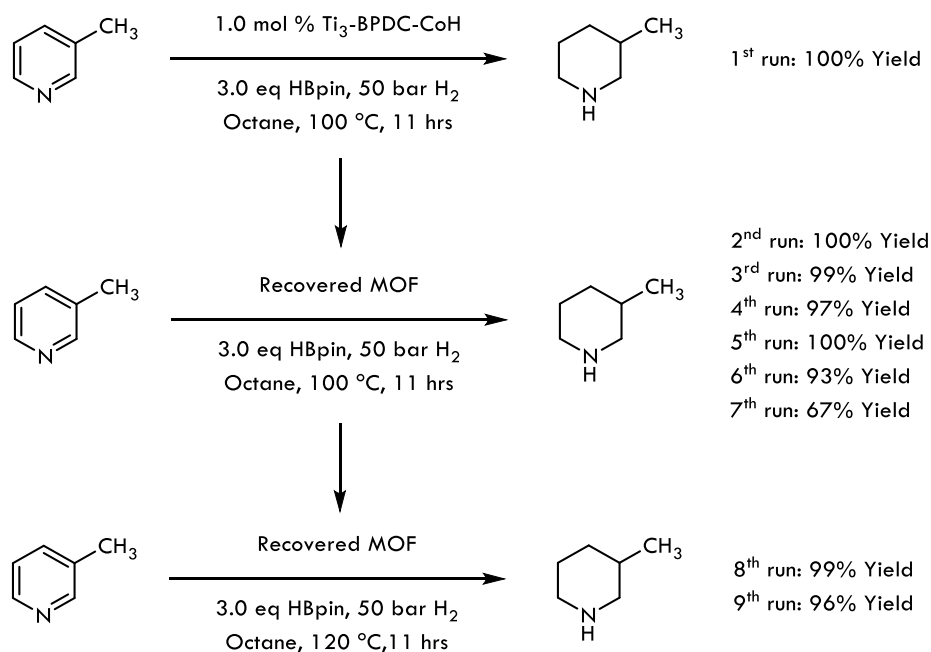

**Figure S31.** Recycle experiment of  $Ti_3$ -BPDC-CoH for the cascade reduction of 3-picoline.



In a nitrogen-filled glovebox,  $\text{Ti}_3\text{-BPDC-CoCl}$  (10.0 mg, 5.0  $\mu\text{mol}$  Co) in 1.0 mL toluene was charged into a glass vial.  $\text{NaBEt}_3\text{H}$  (50  $\mu\text{L}$ , 1.0 M in toluene) was added to the vial and the mixture was stirred for 1 hour. The solid was then centrifuged, washed with toluene three times, and washed with octane twice, before being transferred into a Parr reactor with 1 mL octane. 3-Picoline (49  $\mu\text{L}$ , 0.50 mmol) and pinacolborane (219  $\mu\text{L}$ , 1.50 mmol) were then added to the solution. The Parr reactor was sealed under nitrogen and charged with hydrogen to 50 bar. After stirring at 100  $^\circ\text{C}$  for 11 hours, the pressure was released and the MOF catalyst was removed from the reaction mixture via centrifugation. The supernatant was transferred to a vial, and the MOF was washed with octane for later use. After being quenched with 2 drops of methanol, the supernatant was analyzed by GC-MS to give 3-methylpiperidine in 100% yield. The recovered solid catalyst was used for subsequent cycles of reactions. The reaction mixture of 3-picoline (49  $\mu\text{L}$ , 0.50 mmol), pinacolborane (219  $\mu\text{L}$ , 1.50 mmol), and the recovered MOF in 1 mL of octane was stirred for 11 hours in each run. Starting from the 8<sup>th</sup> run, the reaction temperature was increased to 120  $^\circ\text{C}$ .

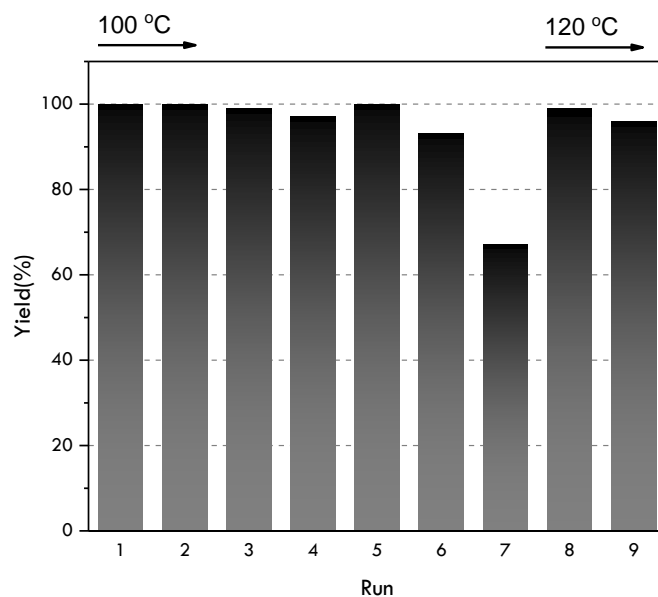

**Figure S32.** Plots of yields (%) of 3-methylpiperidine in six consecutive runs of  $\text{Ti}_3\text{-BPDC-CoH}$  catalyzed cascade reduction of 3-picoline. The Co-loadings were 1.0 mol%.

We also performed incomplete yield recycle experiments with a low  $\text{Ti}_3\text{-BPDC-CoH}$  catalyst loading of 0.5 mol% and a short reaction time of 5 h. No significant decrease in catalyst activity was observed in three runs (1st run: 68%; 2<sup>nd</sup> run: 53%; 3<sup>rd</sup> run: 58%).

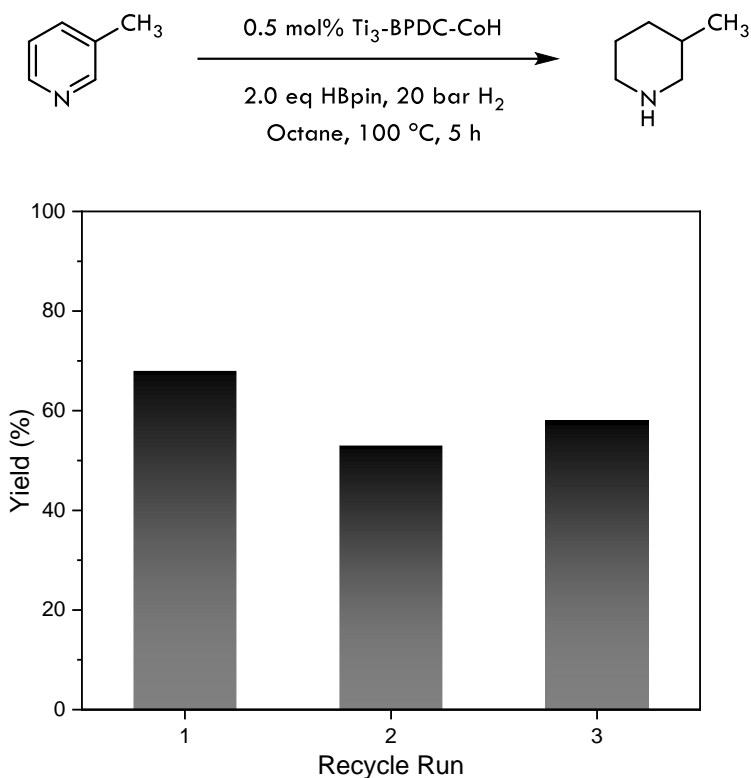

**Figure S33.** Plots of yields (%) of 3-methylpiperidine in three consecutive runs of  $\text{Ti}_3\text{-BPDC-CoH}$  catalyzed cascade reduction of 3-picoline. The Co-loadings were 0.5 mol%. Reaction condition: 0.5 mol% catalyst loading, 20 bar  $\text{H}_2$ , 2.0 eq HBpin, 1 mL Octane as solvent, 100 °C, 5 h.

## 5.6 Hot Filtration Test

“Hot Filtration” test was performed to rule out the possibility of leached Co species contributing to the cascade reduction reactivity. Specifically, 0.5 mol% of  $\text{Ti}_3\text{-BPDC-CoH}$  was first used to catalyze cascade reduction of quinolines to give 1,2,3,4-tetrahydroquinoline in >99% yield. Then, the MOF and supernatant were separated in a glovebox and used as catalysts for the cascade reduction of 3-picoline without any treatment. The recovered  $\text{Ti}_3\text{-BPDC-CoH}$  catalyst

afforded 3-methylpiperidine in 93% yield, while no conversion was detected in the reaction catalyzed by the supernatant. This experiment showed that the true catalytic species is MOF-supported Co-H but not leached Co species in the supernatant.

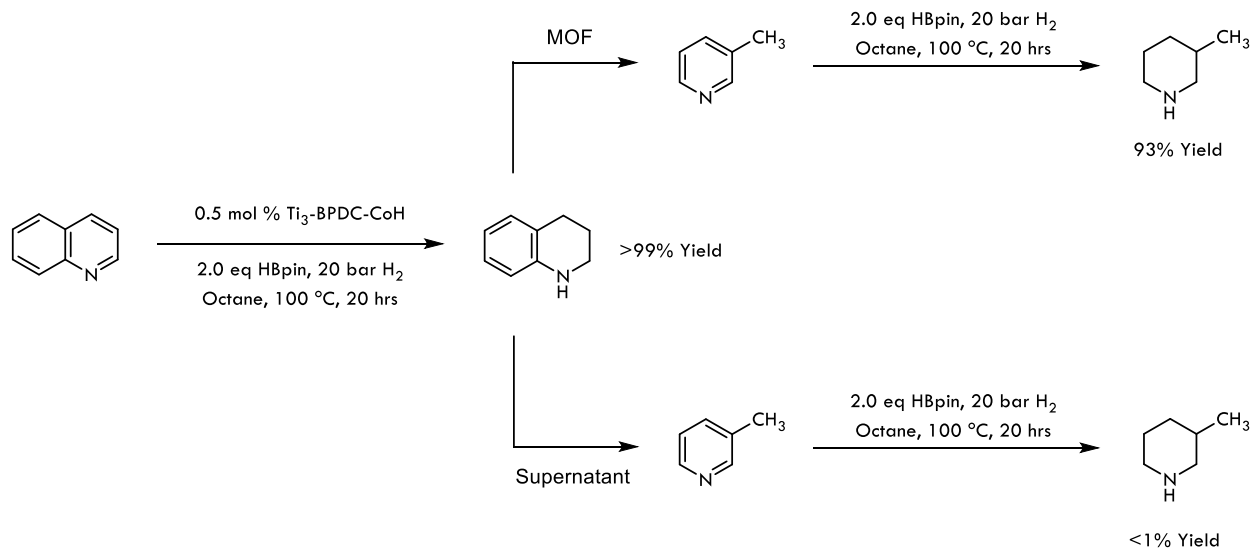

**Figure S34.** The “Hot Filtration” test of Ti<sub>3</sub>-BPDC-CoH catalyzed cascade reduction of *N*-heteroarenes.

## 5.7 Screen for Broader Substrate Scope for Ti<sub>3</sub>-BPDC-CoH Catalyzed Cascade Reduction of Pyridines

Beside the substrates shown in Table 1, several other pyridine derivatives have also been tested under standard or optimized conditions in Ti<sub>3</sub>-BPDC-CoH catalyzed cascade reduction. The yields of different products were determined by GC-MS analysis.

As shown in Figure S35, boronic esters, amino groups and fluoride are tolerated under reaction conditions, although the product yields range from good to moderate. The reactive alkynyl group on the substrate was also fully hydrogenated under the cascade reduction reaction conditions.

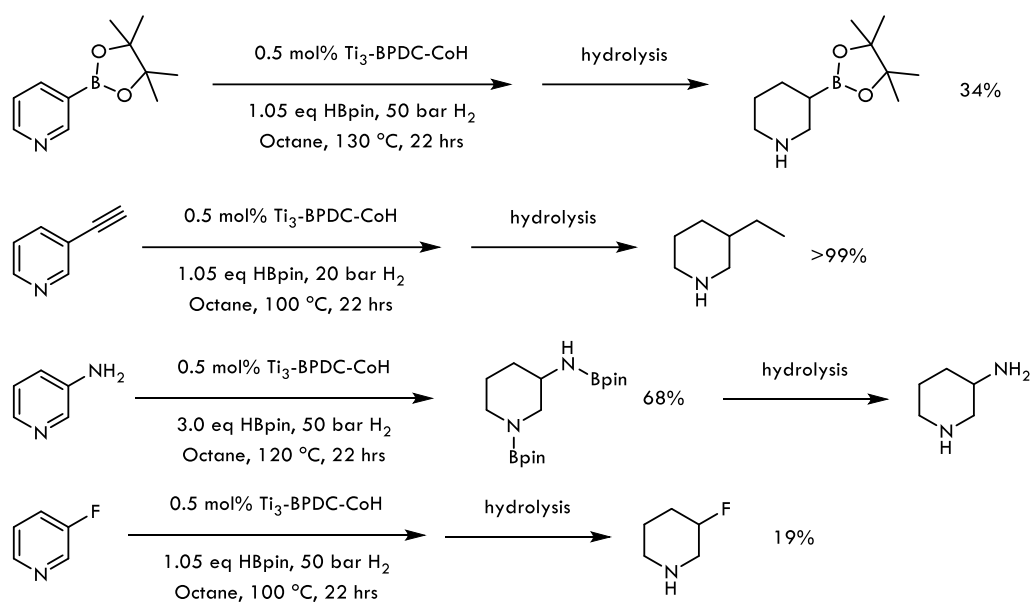

**Figure S35.** Additional substrate scope screening for  $\text{Ti}_3\text{-BPDC-CoH}$  catalyzed cascade reduction.

## 5.8 Reactivity Comparison with UiO-68-CoH

The catalytic activity of the present Co-H species supported by two neighboring SBUs in  $\text{Ti}_3\text{-BPDC-CoH}$  was compared to that in the previously reported UiO-68-CoH catalyst.<sup>21</sup> As shown in Table S11, while 0.2 mol% of  $\text{Ti}_3\text{-BPDC-CoH}$  catalyzed the cascade reduction of 3-picoline to 3-methylpiperidine in 97% yield, only 4% of the product was detected when the reaction was carried out using UiO-68-CoH at a higher loading of 0.5%. We attribute such a dramatic difference in catalytic performance to their different anchoring modes. In UiO-68-CoH, each Co-H complex was supported by one  $\text{Zr}_3\text{O}^-$  and Co centers can leach into the solution by strongly coordinating *N*-heteroarene to form inactive or less active Co nanoparticles. In contrast,  $\text{Ti}_3\text{-BPDC}$  provides two neighboring Ti-O<sup>-</sup> sites to chelate the Co-H complex, leading to a more robust catalyst. ICP-MS analyses showed that only 0.4% Co leached from  $\text{Ti}_3\text{-BPDC-CoH}$  after catalysis while nearly half of the Co species had leached from UiO-68-CoH under the same condition.

**Table S11.** Cascade Reduction Activity Comparison between  $\text{Ti}_3\text{-BPDC-CoH}$  and UiO-68-CoH.<sup>a</sup>

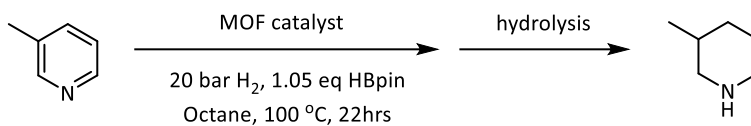

| Catalyst                           | Yield of<br>3-methylpiperidine / % | Co Leaching<br>after Reaction / % |
|------------------------------------|------------------------------------|-----------------------------------|
| 0.2 mol% Ti <sub>3</sub> -BPDC-CoH | 97                                 | 0.4                               |
| 0.5 mol% UiO-68-CoH                | 4                                  | 42.3                              |

<sup>a</sup>Reaction conditions: Ti<sub>3</sub>-BPDC-CoH (1 μmol Co) or UiO-68-CoH (2.5 μmol Co), 0.5 mmol 3-picoline, 0.525 mmol pinacolborane, 20 bar H<sub>2</sub>, 1 mL Octane, 100 °C, 22 hrs; Yield was determined by GC-MS analysis, mesitylene as internal standard.

## 6. Ti<sub>3</sub>-BPDC-CoH Catalyzed Selective Reduction of Quinolines

**A Typical Procedure for Ti<sub>3</sub>-BPDC-CoH Catalyzed Selective Reduction of Quinolines (Table 2).**

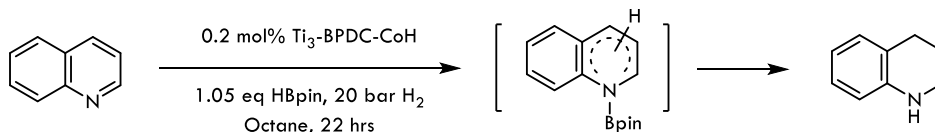

In a nitrogen-filled glovebox, Ti<sub>3</sub>-BPDC-CoCl (2.0 mg, 1.0 μmol Co) in 1.0 mL toluene was charged into a glass vial. NaBEt<sub>3</sub>H (10 μL, 1.0 M in toluene) was added to the vial and the mixture was stirred for 1 hour. The solid was then centrifuged, washed with toluene three times, and washed with octane twice, before being transferred into a Parr reactor with 1 mL octane. Quinoline (59 μL, 0.50 mmol) and pinacolborane (77 μL, 0.525 mmol) were then added to the solution. The Parr reactor was sealed under nitrogen and charged with hydrogen to 20 bar. After stirring at 100 °C for 22 hours, the pressure was released and the MOF catalyst was removed from the reaction mixture via centrifugation. After being quenched with 2 drops of methanol, the supernatant was analyzed by GC-MS to selectively give 1,2,3,4-tetrahydroquinoline in 98% yield along with a trace amount (< 2%) of 5,6,7,8-tetrahydroquinoline and decahydroquinoline.

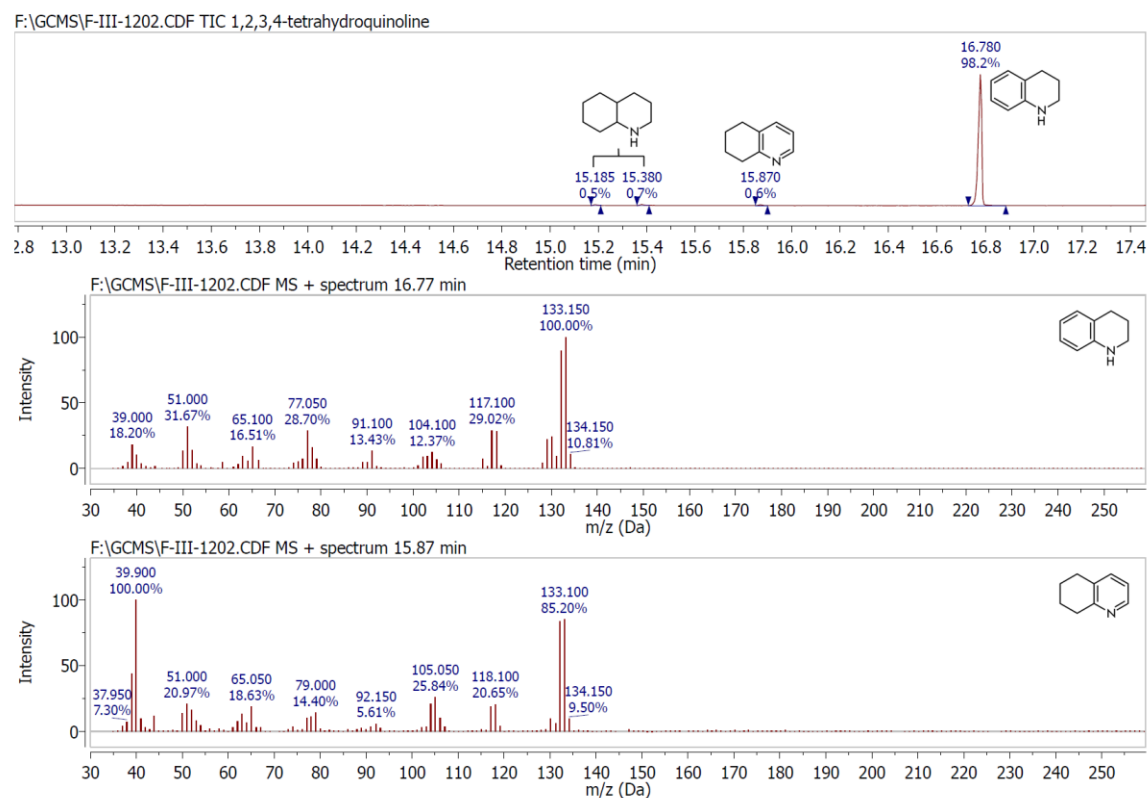

**Figure S36.** GC-MS spectrum of selective reduction of quinoline to afford 1,2,3,4-tetrahydroquinoline.

## 7. GC-MS Analysis

The conversions of reactions were determined by GC-MS using a Shimadzu GCMS-QP2010 Ultra. Column: SH-Rxi-5Sil MS column, 30.0 m in length, 0.25 mm in diameter, 0.25  $\mu$ m in thickness. GC conditions: Injection temperature, 220  $^{\circ}$ C; Column temperature program, 30  $^{\circ}$ C hold for 5 min, followed by a ramp of 5  $^{\circ}$ C/min to 60  $^{\circ}$ C then a ramp of 20  $^{\circ}$ C/min to 300  $^{\circ}$ C; Column flow, 1.21 mL/min.

**Table S12.** The retention times of GC traces I (some compounds have multiple stereoisomers, thus showing more than one peak with the expected molecular mass).

| Compound | Retention Time | Compound | Retention Time |
|----------|----------------|----------|----------------|
|----------|----------------|----------|----------------|

|                                                                                     |                           |                                                                                      |            |
|-------------------------------------------------------------------------------------|---------------------------|--------------------------------------------------------------------------------------|------------|
| 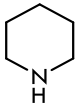   | 5.271 min                 |    | 8.037 min  |
|    | 7.851 min                 |    | 9.133 min  |
|    | 10.445 min;<br>10.755 min |    | 17.514 min |
|    | 11.055 min;<br>11.700 min |    | 17.499 min |
|    | 12.591 min                |    | 16.319 min |
|   | 15.852 min                |   | 18.208 min |
|  | 18.104 min                |  | N.D.       |
|  | 18.179 min                |  | 18.199 min |

**Table S13.** The retention times of GC traces II.

| Compound                                                                            | Retention Time | Compound                                                                             | Retention Time |
|-------------------------------------------------------------------------------------|----------------|--------------------------------------------------------------------------------------|----------------|
| 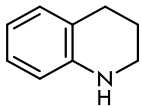 | 16.735 min     |  | 15.870 min     |
|  | 17.938 min     |  | 15.750 min     |

|                                                                                     |            |                                                                                      |            |
|-------------------------------------------------------------------------------------|------------|--------------------------------------------------------------------------------------|------------|
| 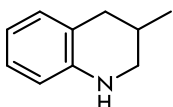   | 17.140 min |    | 16.811 min |
|    | 17.471 min |    | N.D.       |
|    | 17.572 min |    | N.D.       |
|    | 17.208 min |    | 17.008 min |
|    | 18.438 min |    | 17.309 min |
|    | 18.503 min |    | N.D.       |
|   | 20.363 min |   | 18.532 min |
|  | N.D.       |  | N.D.       |

## 8. References

1. M. Dan-Hardi, C. Serre, T. Frot, L. Rozes, G. Maurin, C. Sanchez and G. Férey, *J. Am. Chem. Soc.*, 2009, **131**, 10857-10859.
2. J. Gao, J. Miao, P.-Z. Li, W. Y. Teng, L. Yang, Y. Zhao, B. Liu and Q. Zhang, *Chem. Commun.*, 2014, **50**, 3786-3788.
3. B. Bueken, F. Vermoortele, D. E. Vanpoucke, H. Reinsch, C. C. Tsou, P. Valvekens, T. De Baerdemaeker, R. Ameloot, C. E. Kirschhock and V. Van Speybroeck, *Angew. Chem. Int. Ed.*, 2015, **54**, 13912-13917.
4. J. A. Mason, L. E. Darago, W. W. Lukens Jr and J. R. Long, *Inorg. Chem.*, 2015, **54**, 10096-10104.
5. S. Yuan, T.-F. Liu, D. Feng, J. Tian, K. Wang, J. Qin, Q. Zhang, Y.-P. Chen, M. Bosch, L. Zou, S. J. Teat, S. J. Dalgarno and H.-C. Zhou, *Chem. Sci.*, 2015, **6**, 3926-3930.



6. H. Assi, L. C. Pardo Pérez, G. Mouchaham, F. Ragon, M. Nasalevich, N. Guillou, C. Martineau, H. Chevreau, F. Kapteijn and J. Gascon, *Inorg. Chem.*, 2016, **55**, 7192-7199.
7. H. L. Nguyen, F. Gándara, H. Furukawa, T. L. Doan, K. E. Cordova and O. M. Yaghi, *J. Am. Chem. Soc.*, 2016, **138**, 4330-4333.
8. H. L. Nguyen, T. T. Vu, D. Le, T. L. Doan, V. Q. Nguyen and N. T. Phan, *ACS Catal.*, 2016, **7**, 338-342.
9. S. Wang, T. Kitao, N. Guillou, M. Wahiduzzaman, C. Martineau-Corcós, F. Nouar, A. Tissot, L. Binet, N. Ramsahye and S. Devautour-Vinot, *Nat. Commun.*, 2018, **9**.
10. Y. Keum, S. Park, Y.-P. Chen and J. Park, *Angew. Chem. Int. Ed.*, 2018, DOI: doi:10.1002/anie.201809762, doi:10.1002/anie.201809762.
11. K. Hong and H. Chun, *Inorg. Chem.*, 2013, **52**, 9705-9707.
12. T. Yang, S.-j. Park, T. G. Kim, D. S. Shin and J. Park, *Opt. Express*, 2017, **25**, 30843-30850.
13. C. Xie, S. Yang, J. Shi and C. Niu, *Catalysts*, 2016, **6**, 117.
14. H. Belhadj, A. Hakki, P. K. J. Robertson and D. W. Bahnemann, *Phys. Chem. Chem. Phys.*, 2015, **17**, 22940-22946.
15. H. Sheng, H. Zhang, W. Song, H. Ji, W. Ma, C. Chen and J. Zhao, *Angew. Chem. Int. Ed.*, 2015, **54**, 5905-5909.
16. J. J. Rehr and R. C. Albers, *Rev. Mod. Phys.*, 2000, **72**, 621.
17. B. Ravel and M. Newville, *J. Synchrotron. Rad.*, 2005, **12**, 537-541.
18. F. Dai, Q. Gui, J. Liu, Z. Yang, X. Chen, R. Guo and Z. Tan, *Chem. Commun.*, 2013, **49**, 4634-4636.
19. S. Thapa, S. K. Gurung, D. A. Dickie and R. Giri, *Angew. Chem. Int. Ed.*, 2014, **53**, 11620-11624.
20. P. Ji, X. Feng, S. S. Veroneau, Y. Song and W. Lin, *J. Am. Chem. Soc.*, 2017, **139**, 15600-15603.
21. K. Manna, P. Ji, Z. Lin, F. X. Greene, A. Urban, N. C. Thacker and W. Lin, *Nat. Commun.*, 2016, **7**, 12610.
